# Supplementary material for: NacNac-zinc-pyridonate mediated ε-caprolactone ROP
Source: Royal Society of Chemistry journal article supplement (doi:10.1039/d3dt03344a), 2023-01-01
Supplement: d3dt03344a1.pdf [file d3dt03344a1.pdf]

## Supporting Information

### NacNac-zinc-pyridonate mediated $\epsilon$ -caprolactone ROP

Jack W. J. Hughes, Dawid J. Babula, Findlay Stowers-Veitch, Kang Yuan, Marina Uzelac, Gary S. Nichol, Michael J. Ingleson\* Jennifer A. Garden\*<sup>a</sup>

<sup>a</sup>*EaStCHEM School of Chemistry, University of Edinburgh, Edinburgh, EH9 3FJ, UK*

\*E-mail: j.garden@ed.ac.uk

|                                                                                                                                                                                                                                 |    |
|---------------------------------------------------------------------------------------------------------------------------------------------------------------------------------------------------------------------------------|----|
| 1. Characterisation of complex <b>1</b> .....                                                                                                                                                                                   | 3  |
| <b>Figure S1.</b> <sup>1</sup> H NMR spectrum of complex <b>1</b> in CD <sub>2</sub> Cl <sub>2</sub> (298 K) .....                                                                                                              | 3  |
| <b>Figure S2.</b> <sup>13</sup> C{ <sup>1</sup> H} NMR spectrum of complex <b>1</b> in CD <sub>2</sub> Cl <sub>2</sub> (298 K, * = PhCl). N.B. CH <sub>2</sub> Cl <sub>2</sub> portion of the spectra removed for clarity ..... | 3  |
| <b>Figure S3.</b> DOSY NMR spectra of <b>1</b> in CD <sub>3</sub> C <sub>6</sub> D <sub>5</sub> (298 K) at polymerisation relevant concentration ....                                                                           | 4  |
| 2. Characterisation of silver salt <b>3</b> .....                                                                                                                                                                               | 5  |
| <b>Figure S4.</b> <sup>1</sup> H NMR spectrum of <b>3</b> in (CD <sub>3</sub> ) <sub>2</sub> SO (323 K) .....                                                                                                                   | 5  |
| <b>Figure S5.</b> <sup>13</sup> C NMR spectrum of <b>3</b> in (CD <sub>3</sub> ) <sub>2</sub> SO (323 K) .....                                                                                                                  | 6  |
| 3. Characterisation of complex <b>2</b> .....                                                                                                                                                                                   | 7  |
| <b>Figure S6.</b> <sup>1</sup> H NMR spectrum of <b>2</b> in CD <sub>3</sub> C <sub>6</sub> D <sub>5</sub> (298 K) .....                                                                                                        | 7  |
| <b>Figure S7.</b> <sup>13</sup> C{ <sup>1</sup> H} NMR spectrum of <b>2</b> in CD <sub>3</sub> C <sub>6</sub> D <sub>5</sub> (298K) .....                                                                                       | 7  |
| <b>Figure S8:</b> DOSY NMR spectrum of <b>2</b> in CD <sub>3</sub> C <sub>6</sub> D <sub>5</sub> (298K) .....                                                                                                                   | 8  |
| 4. ROP of $\epsilon$ -CL in toluene/THF at RT to 60 °C catalysed by complexes <b>1</b> - <b>2</b> .....                                                                                                                         | 9  |
| <b>Table S1.</b> $\epsilon$ -CL ROP data .....                                                                                                                                                                                  | 9  |
| 5. MALDI-ToF spectra .....                                                                                                                                                                                                      | 10 |
| <b>Figure S9.</b> MALDI-ToF MS analysis of crude PCL made in the presence of <b>1</b> after 4 h in toluene at 60 °C (table 2, entry 3). .....                                                                                   | 10 |
| <b>Figure S10.</b> MALDI-ToF MS analysis of crude PCL made in the presence of <b>1</b> after 24 h in toluene at 60 °C. ....                                                                                                     | 10 |
| <b>Figure S11.</b> MALDI-ToF MS analysis of crude PCL made in the presence of <b>2</b> after 2 h in toluene at RT (table 2, entry 7). MALDI-ToF preparation method b) was used .....                                            | 11 |
| <b>Figure S12.</b> MALDI-ToF MS analysis of crude PCL made in the presence of <b>2</b> after 2 h in THF at RT. MALDI-ToF preparation method b) was used .....                                                                   | 11 |
| <b>Figure S13.</b> MALDI-ToF MS analysis of purified PCL (cold MeOH/H <sup>+</sup> ) made in the presence of <b>2</b> after 4 h in toluene at RT. MALDI-ToF preparation method b) was used .....                                | 12 |
| 6. Proposed, simplified scheme for ring closure .....                                                                                                                                                                           | 12 |

|     |                                                                                                                                                                                                                                                                                          |    |
|-----|------------------------------------------------------------------------------------------------------------------------------------------------------------------------------------------------------------------------------------------------------------------------------------------|----|
|     | <b>Figure S14.</b> Proposed ring-closure step using a simplified schematic: cyclisation of the PCL chain liberating the pyridonate anion to reform the catalytic species .....                                                                                                           | 12 |
| 7.  | Example SEC traces .....                                                                                                                                                                                                                                                                 | 13 |
|     | <b>Figure S15.</b> Example SEC trace of crude PCL generated in the presence of <b>1</b> in toluene at 60 °C (1 h) (table 2, entry 2) .....                                                                                                                                               | 13 |
|     | <b>Figure S16.</b> Example SEC trace of crude PCL generated in the presence of <b>1</b> in toluene at 60 °C (4 h) (table 2, entry 3) .....                                                                                                                                               | 13 |
|     | <b>Figure S17.</b> Example SEC trace of crude PCL generated in the presence of <b>2</b> in toluene at RT (2 h) (table 2, entry 7) .....                                                                                                                                                  | 14 |
|     | <b>Figure S18.</b> Example SEC trace of crude PCL generated in the presence of <b>2</b> in THF at RT (2 h). ....                                                                                                                                                                         | 14 |
| 8.  | Equations .....                                                                                                                                                                                                                                                                          | 14 |
| 9.  | Crystal refinement data .....                                                                                                                                                                                                                                                            | 15 |
|     | <b>Table S2.</b> Crystal data and structure refinement for complex <b>1</b> (co-crystallised out of CH <sub>2</sub> Cl <sub>2</sub> ) and <b>2</b> .....                                                                                                                                 | 15 |
| 10. | DOSY parameters and instrumentation.....                                                                                                                                                                                                                                                 | 16 |
|     | <b>Table S3.</b> Diffusion coefficients of standards in toluene-d <sub>8</sub> solution compared to their molecular weights.....                                                                                                                                                         | 17 |
|     | <b>Figure S19.</b> Plot of Log(D) vs. log(MW) constructed from the <sup>1</sup> H DOSY NMR data of adamantane, 2-phenylpyridine, pyrene, tri(o-tolyl)-phosphine, tetraphenylphthaline and 2,2'-bis(diphenylphosphino)-1,1'-binaphthyl (BINAP) standards in toluene-d <sub>8</sub> . .... | 17 |
| 11. | Computational details for the structures of <b>1</b> and <b>2</b> .....                                                                                                                                                                                                                  | 18 |
|     | <b>Figure S20.</b> Monomeric computed structures of <b>1</b> (left) and <b>2</b> (right).....                                                                                                                                                                                            | 18 |
|     | <b>Table S4.</b> Bond lengths and angles calculated for monomeric <b>1</b> and <b>2</b> .....                                                                                                                                                                                            | 18 |
|     | <b>Figure S21:</b> Calculated gain in free energy upon dissolution of <b>1</b> and <b>2</b> into their monomeric species.....                                                                                                                                                            | 19 |
| 12. | References .....                                                                                                                                                                                                                                                                         | 32 |

# 1. Characterisation of complex 1

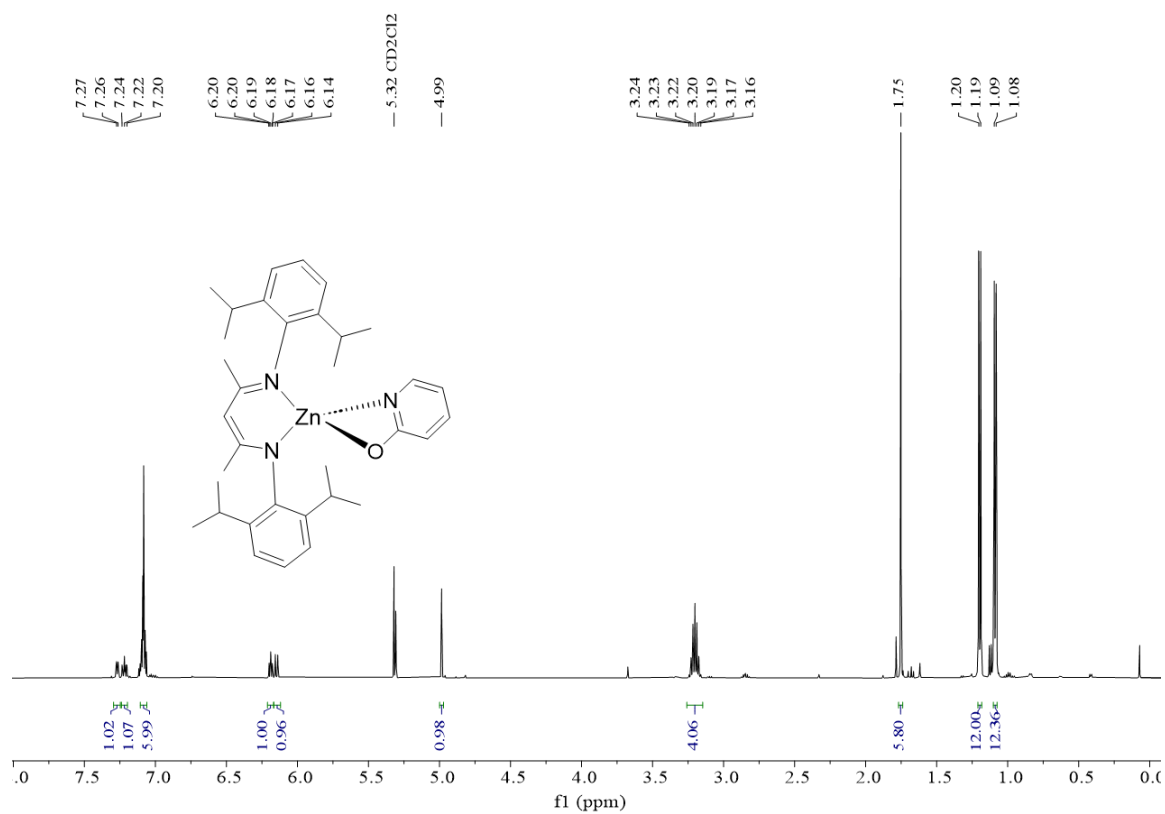

**Figure S1.** <sup>1</sup>H NMR spectrum of complex 1 in CD<sub>2</sub>Cl<sub>2</sub> (298 K)

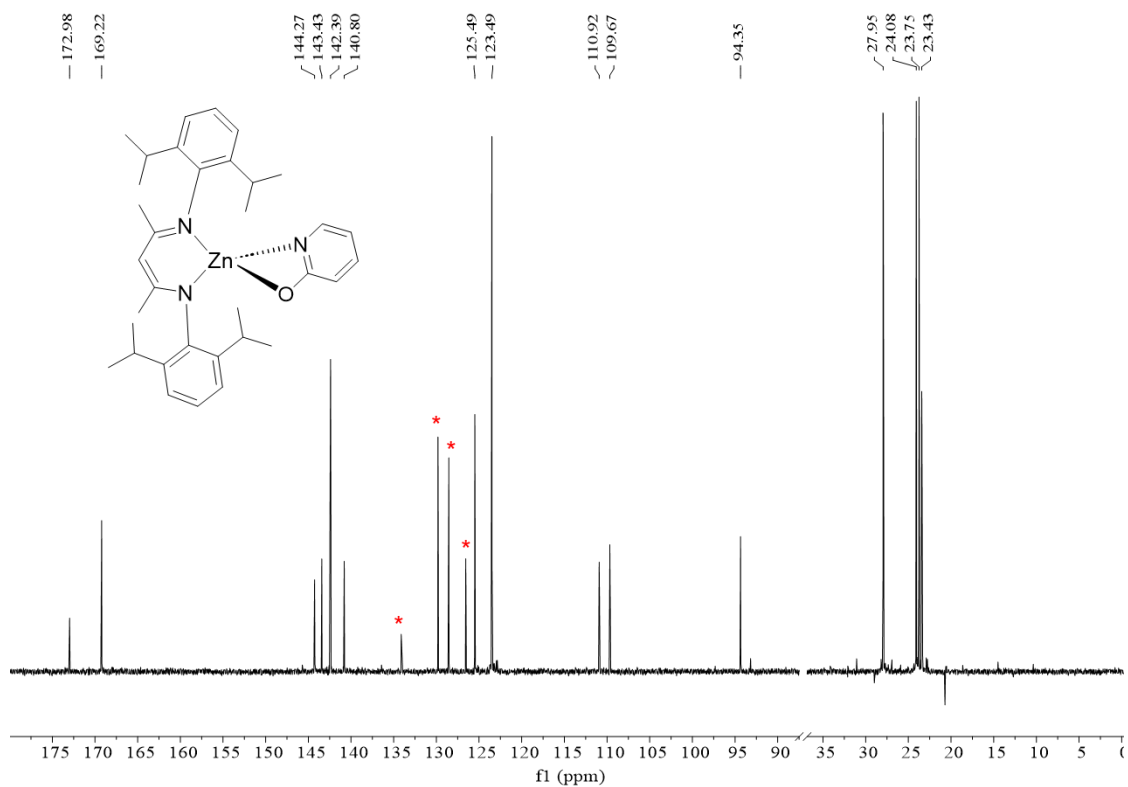

**Figure S2.** <sup>13</sup>C{<sup>1</sup>H} NMR spectrum of complex 1 in CD<sub>2</sub>Cl<sub>2</sub> (298 K, \* = PhCl). N.B. CH<sub>2</sub>Cl<sub>2</sub> portion of the spectra removed for clarity

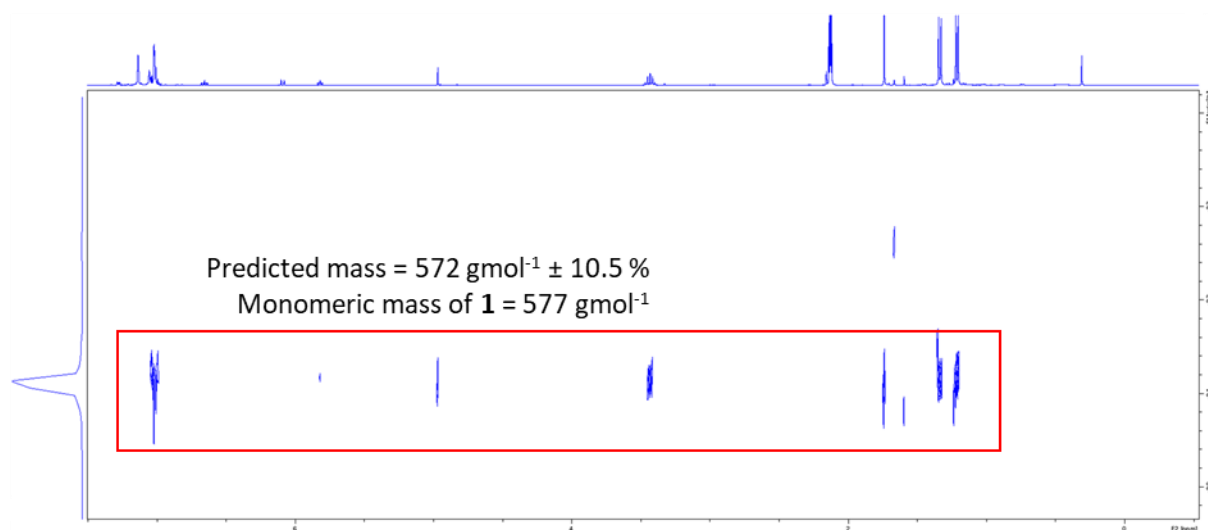

**Figure S3.** DOSY NMR spectra of **1** in  $\text{CD}_3\text{C}_6\text{D}_5$  (298 K) at polymerisation relevant concentration

## 2. Characterisation of silver salt **3**

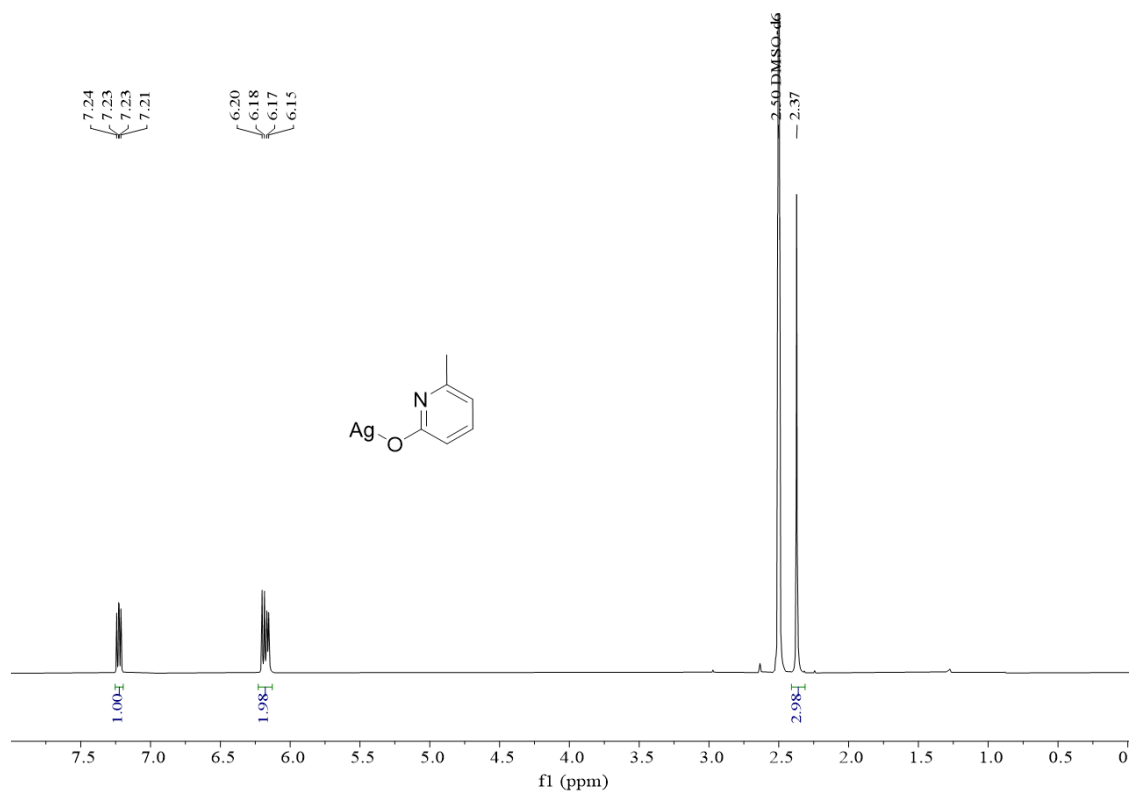

**Figure S4.**  $^1\text{H}$  NMR spectrum of **3** in  $(\text{CD}_3)_2\text{SO}$  (323 K)

A marked downfield shift in proton resonance was noted *c.f.* the free pyridone in  $\text{DMSO}-d_6$ .<sup>3</sup> Note this compound is poorly soluble, hence NMR spectra were recorded at higher temperatures where the solubility is somewhat improved.

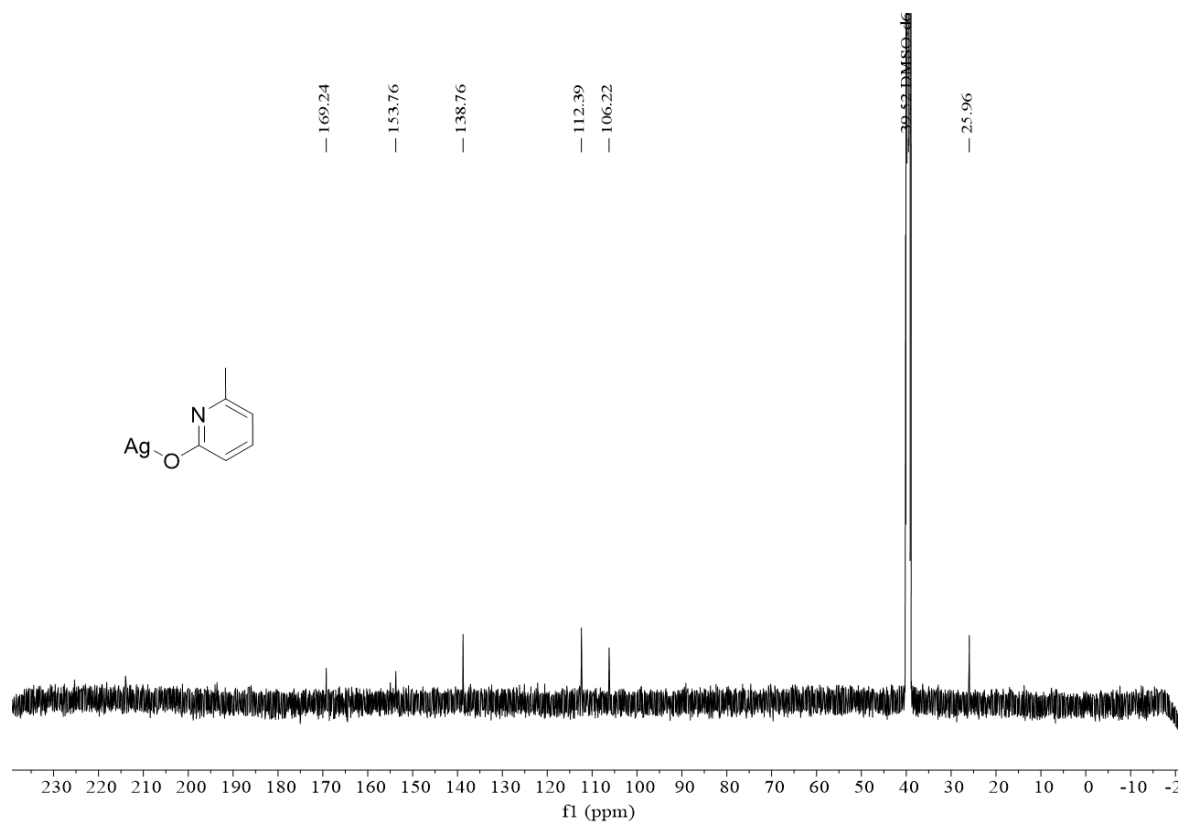

**Figure S5.**  $^{13}\text{C}$  NMR spectrum of **3** in  $(\text{CD}_3)_2\text{SO}$  (323 K).

### 3. Characterisation of complex 2

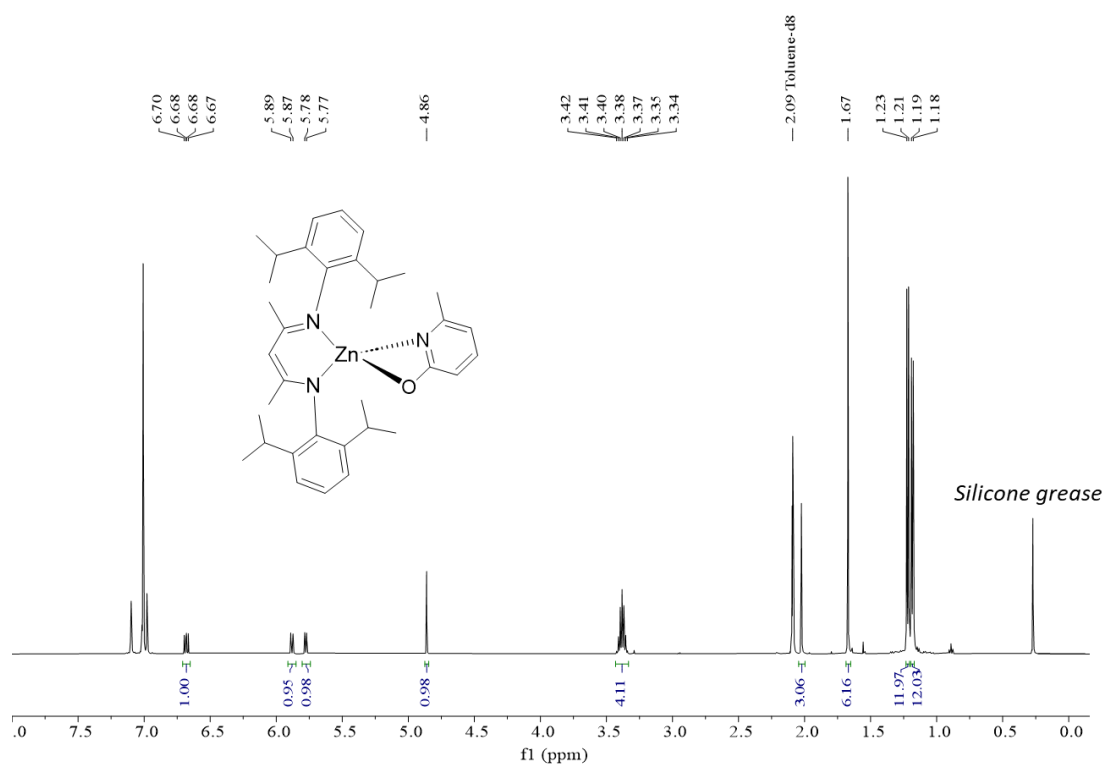

Figure S6.  $^1\text{H}$  NMR spectrum of **2** in  $\text{CD}_3\text{C}_6\text{D}_5$  (298 K)

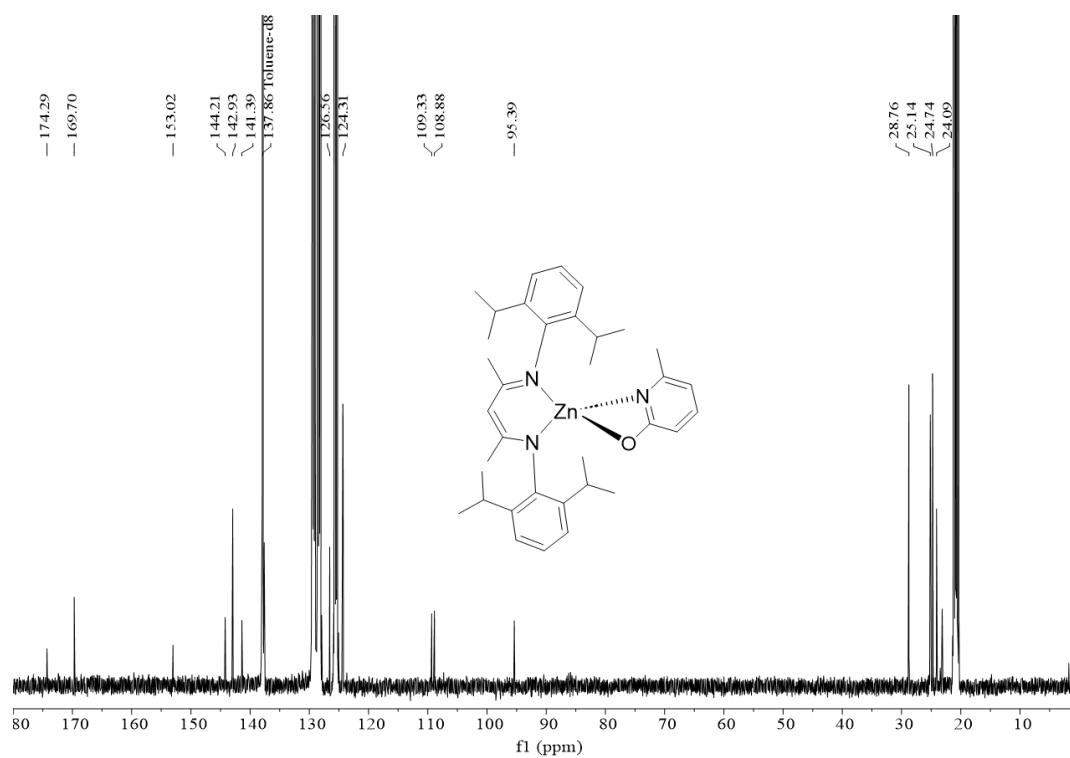

Figure S7.  $^{13}\text{C}\{^1\text{H}\}$  NMR spectrum of **2** in  $\text{CD}_3\text{C}_6\text{D}_5$  (298K)

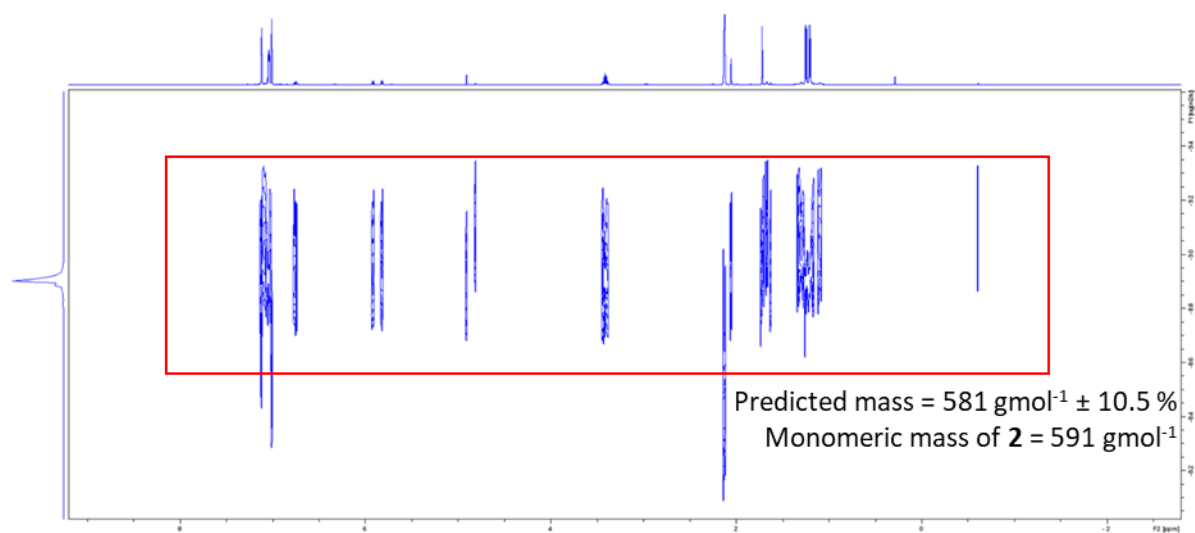

**Figure S8:** DOSY NMR spectrum of **2** in  $\text{CD}_3\text{C}_6\text{D}_5$  (298K)



4. ROP of  $\epsilon$ -CL in toluene/THF at RT to 60 °C catalysed by complexes **1** - **2**.

**Table S1.**  $\epsilon$ -CL ROP data

| Entry           | Catalyst | Temperature | Time (h) | Conv. <sup>a</sup> (%) | $M_n$ (kDa)             |                       | $\bar{D}$ <sup>c</sup> | % Initiation efficiency <sup>d</sup> |
|-----------------|----------|-------------|----------|------------------------|-------------------------|-----------------------|------------------------|--------------------------------------|
|                 |          |             |          |                        | Calculated <sup>b</sup> | Observed <sup>c</sup> |                        |                                      |
| 1               | 1        | RT          | 24       | 6                      | -                       | -                     | -                      | -                                    |
| 2               | 1        | 60 °C       | 0.25     | 14                     | -                       | -                     | -                      | -                                    |
| 3               | 1        | 60 °C       | 0.50     | 33                     | -                       | -                     | -                      | -                                    |
| 4               | 1        | 60 °C       | 1        | 64                     | 7.40                    | 58.8                  | 1.10                   | 12.4                                 |
| 5               | 1        | 60 °C       | 2        | 93                     | -                       | -                     | -                      | -                                    |
| 6               | 1        | 60 °C       | 3        | 96                     | -                       | -                     | -                      | -                                    |
| 7               | 1        | 60 °C       | 4        | 97                     | 11.10                   | 121.11                | 2.24                   | 9.1                                  |
| 8               | 1        | 60 °C       | 5        | 99                     | -                       | -                     | -                      | -                                    |
| 9               | 2        | 60 °C       | 0.33     | 79                     | 9.04                    | 68.10                 | 1.33                   | 6.6                                  |
| 10              | 2        | 60 °C       | 1        | 100                    | 11.41                   | 77.56                 | 1.48                   | 14.7                                 |
| 11              | 2        | RT          | 1        | 2                      | 0.22                    | 9.46                  | -                      | 2.5                                  |
| 12              | 2        | RT          | 2        | 10                     | 1.13                    | 25.42                 | 1.41                   | 4.7                                  |
| 13              | 2        | RT          | 3        | 23                     | 2.57                    | 40.46                 | 1.41                   | 6.7                                  |
| 14              | 2        | RT          | 4        | 43                     | 4.89                    | 45.78                 | 1.47                   | 11.2                                 |
| 15              | 2        | RT          | 5        | 53                     | 6.13                    | 43.29                 | 1.85                   | 14.9                                 |
| 16              | 2        | RT          | 6        | 67                     | 7.62                    | 59.35                 | 1.68                   | 13.5                                 |
| 17 <sup>e</sup> | 2        | RT          | 1        | 0                      | -                       | -                     | -                      | -                                    |
| 18 <sup>e</sup> | 2        | RT          | 2        | 6                      | 0.7                     | 14.6                  | -                      | 4.7                                  |
| 19 <sup>e</sup> | 2        | RT          | 3        | 11                     | 1.2                     | 18.9                  | 1.17                   | 6.8                                  |
| 20 <sup>e</sup> | 2        | RT          | 4        | 17                     | 2.0                     | 22.8                  | 1.23                   | 9.1                                  |
| 21 <sup>e</sup> | 2        | RT          | 23       | 81                     | 9.3                     | 51.0                  | 1.32                   | 19.1                                 |

100:1 [ $\epsilon$ -CL]:[cat], [ $\epsilon$ -CL] = 0.87 M in toluene unless otherwise specified.  $\epsilon$ -CL and the catalyst were both pre stirred in solvent for 5 minutes before mixing. *a* Conversion was calculated ex situ by <sup>1</sup>H NMR spectroscopy. *b*  $M_{n,calc}$  of polymers calculated from monomer conversion  $M_{n,calculated} = ([\epsilon\text{-CL}]_0 / [\text{Cat}]_0) \times (\% \text{ conversion of } \epsilon\text{-CL}) \times 114.14$ , assuming 1 polymer chain per catalyst centre. *c*  $M_{n,observed}$  and  $\bar{D}$  determined by size exclusion chromatography (SEC) using polystyrene standards in THF: values were corrected using a Mark-Houwink correction factor (0.56).<sup>4</sup> *d* calculated according to equations S1-3. *e* performed in THF ([ $\epsilon$ -CL] = 0.87 M)

## 5. MALDI-ToF spectra

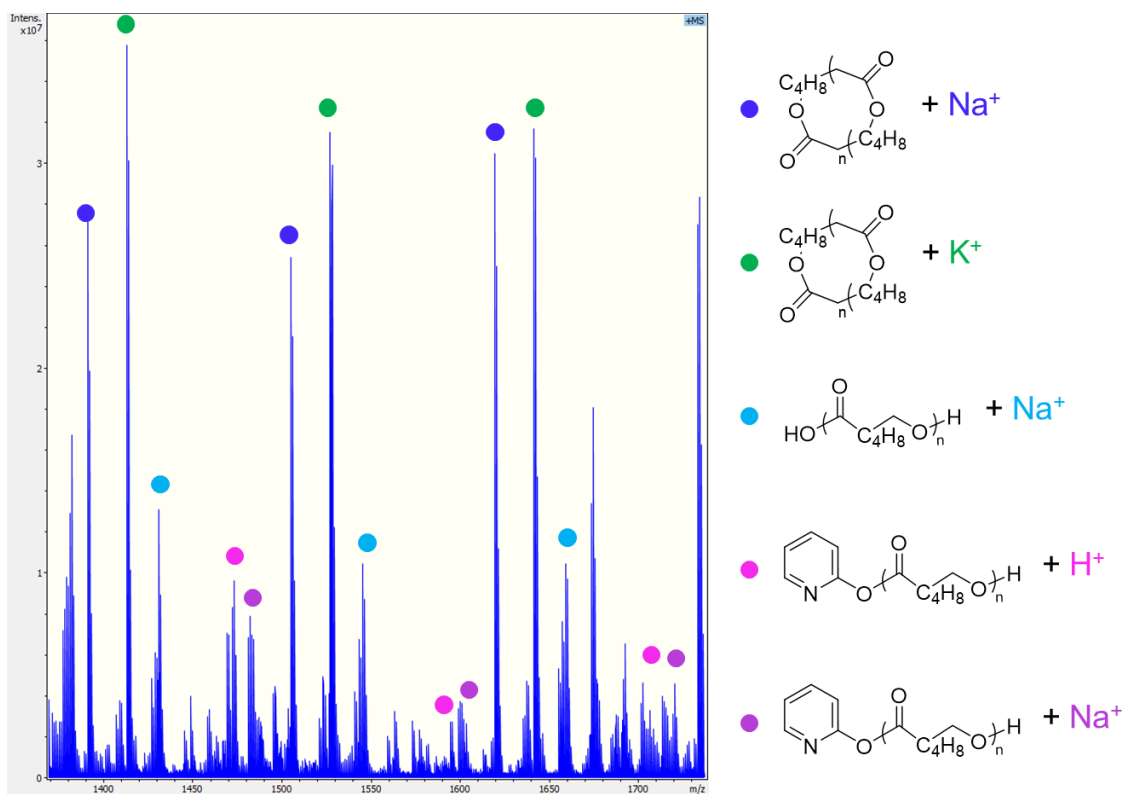

**Figure S9.** MALDI-ToF MS analysis of crude PCL made in the presence of **1** after 4 h in toluene at 60 °C (table 2, entry 3).

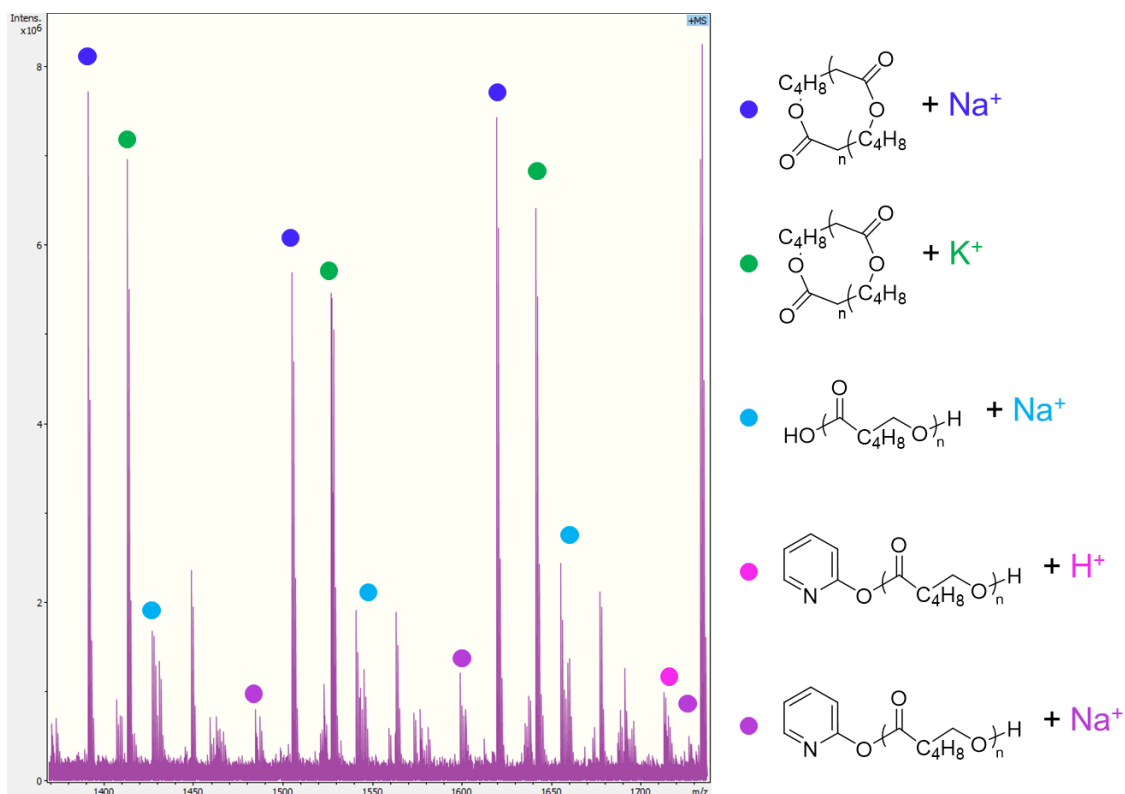

**Figure S10.** MALDI-ToF MS analysis of crude PCL made in the presence of **1** after 24 h in toluene at 60 °C.

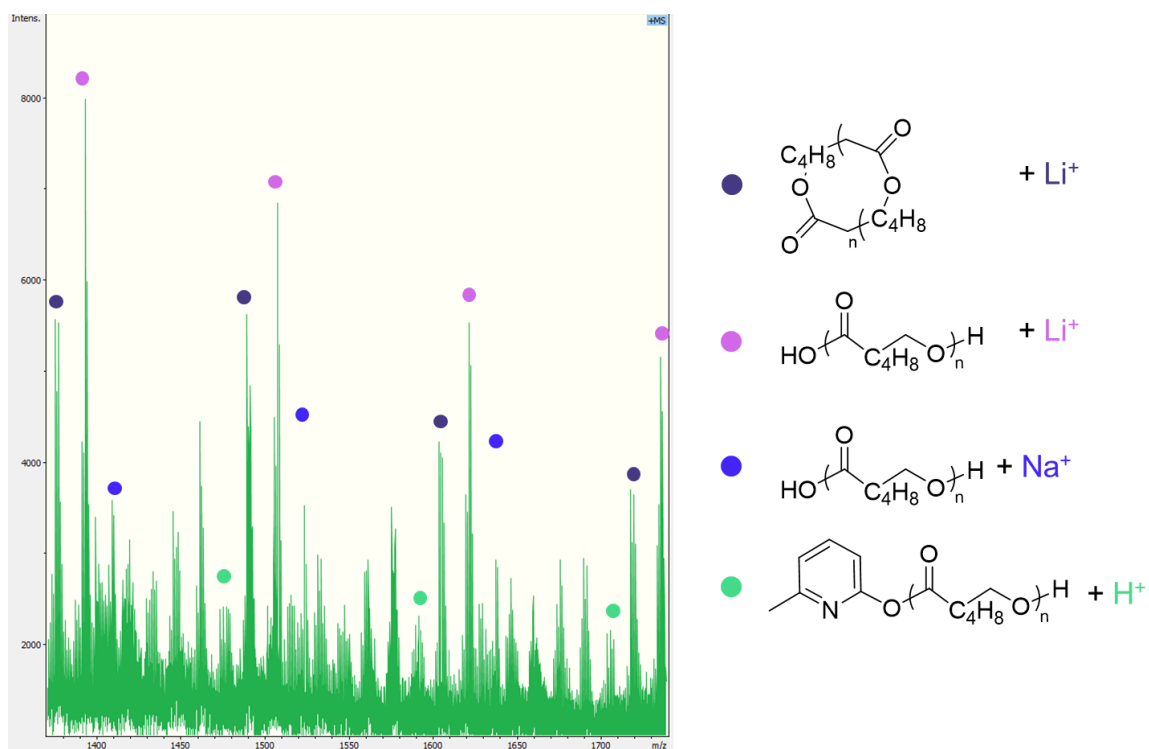

**Figure S11.** MALDI-ToF MS analysis of crude PCL made in the presence of **2** after 2 h in toluene at RT (table 2, entry 7). MALDI-ToF preparation method b) was used.

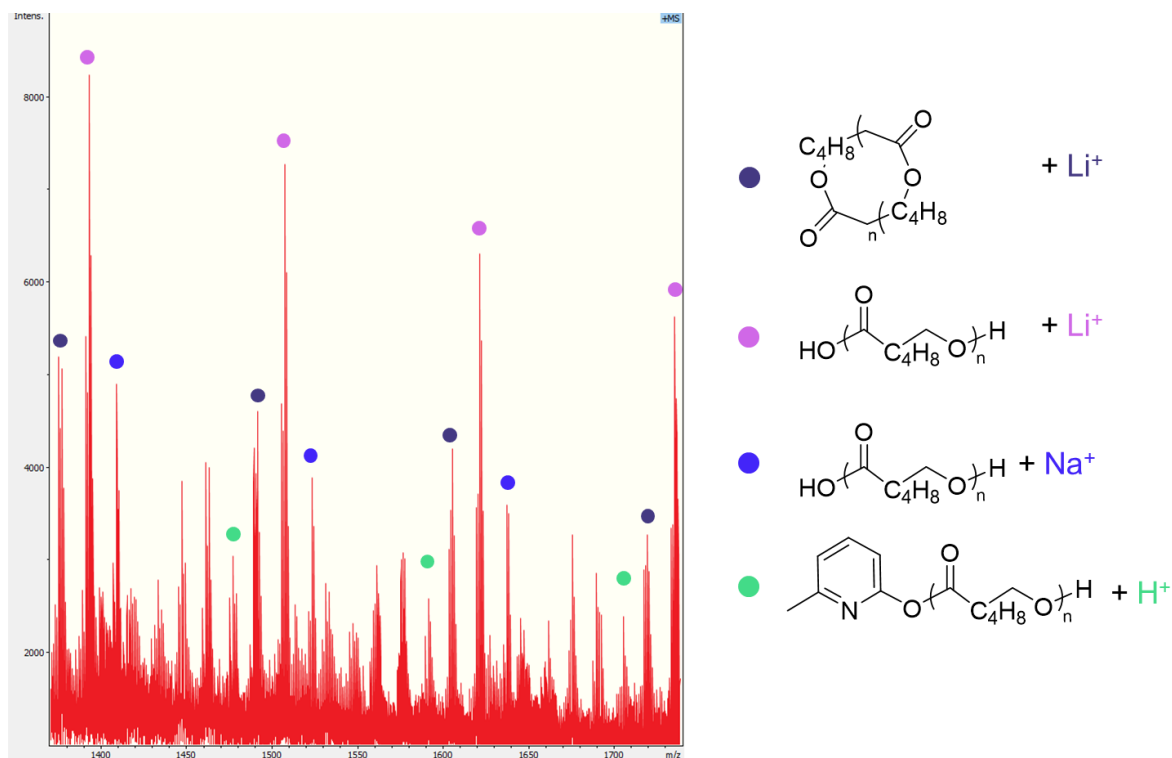

**Figure S12.** MALDI-ToF MS analysis of crude PCL made in the presence of **2** after 2 h in THF at RT. MALDI-ToF preparation method b) was used.

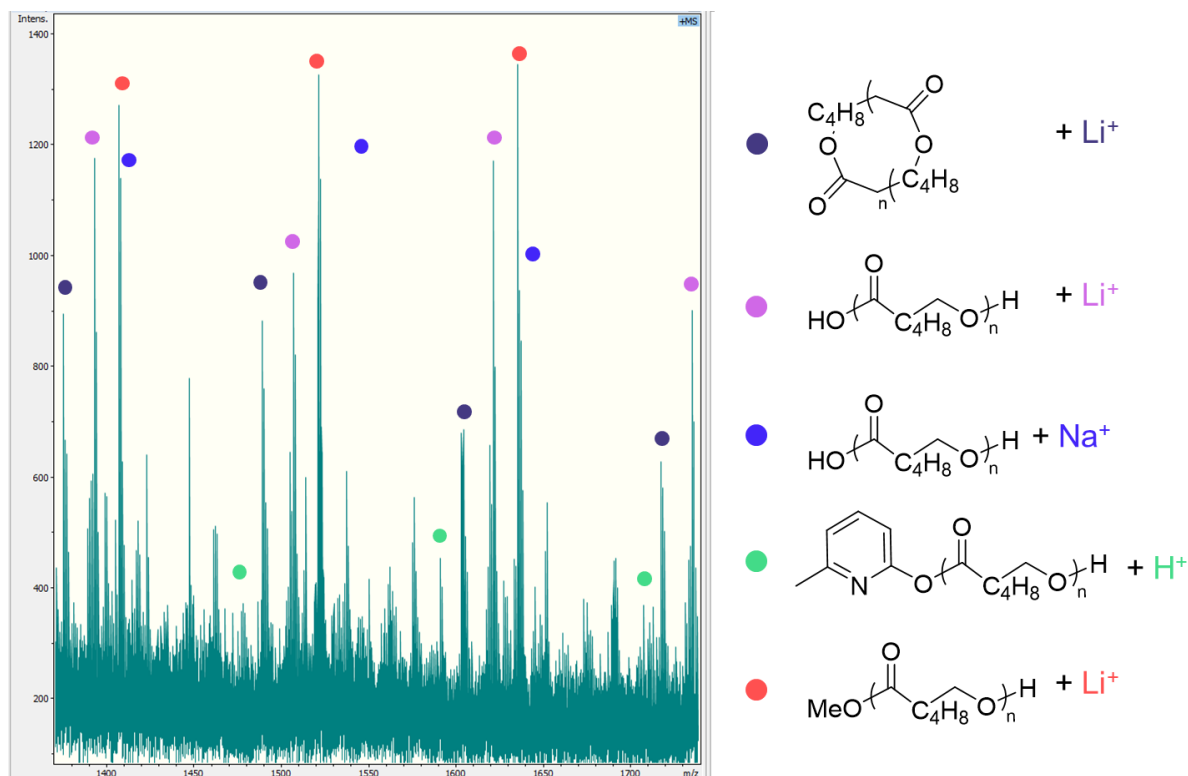

**Figure S13.** MALDI-ToF MS analysis of purified PCL (cold MeOH/H<sup>+</sup> made in the presence of **2** after 4 h in toluene at RT. MALDI-ToF preparation method b) was used

6. Proposed, simplified scheme for ring closure

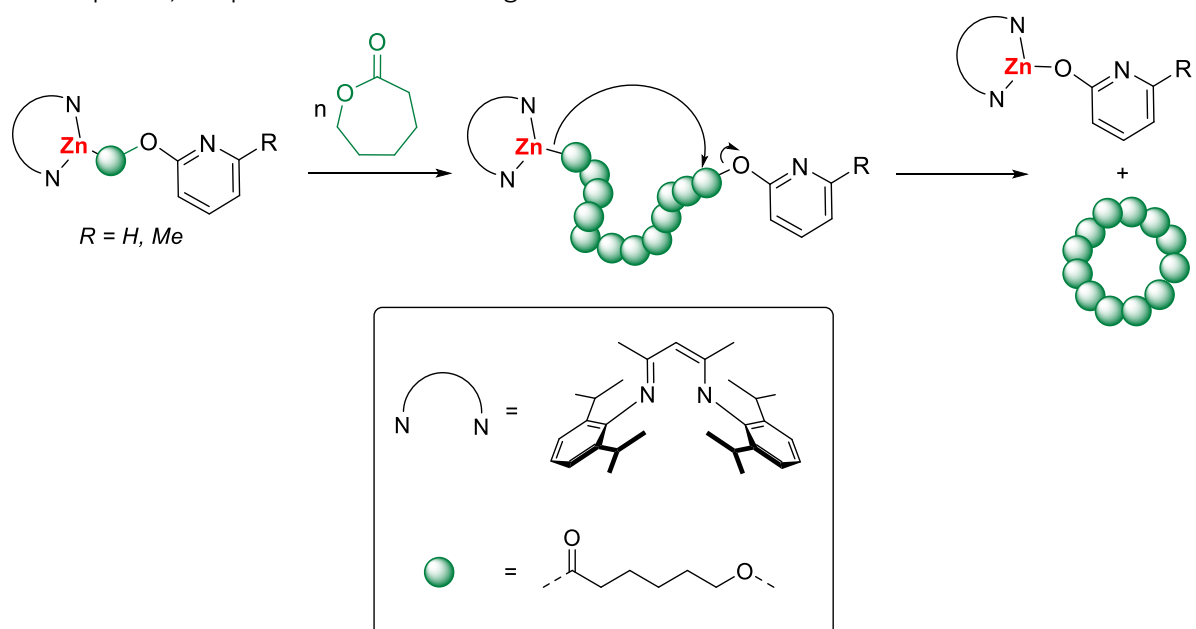

**Figure S14.** Proposed ring-closure step using a simplified schematic: cyclisation of the PCL chain liberating the pyridonate anion to reform the catalytic species

## 7. Example SEC traces

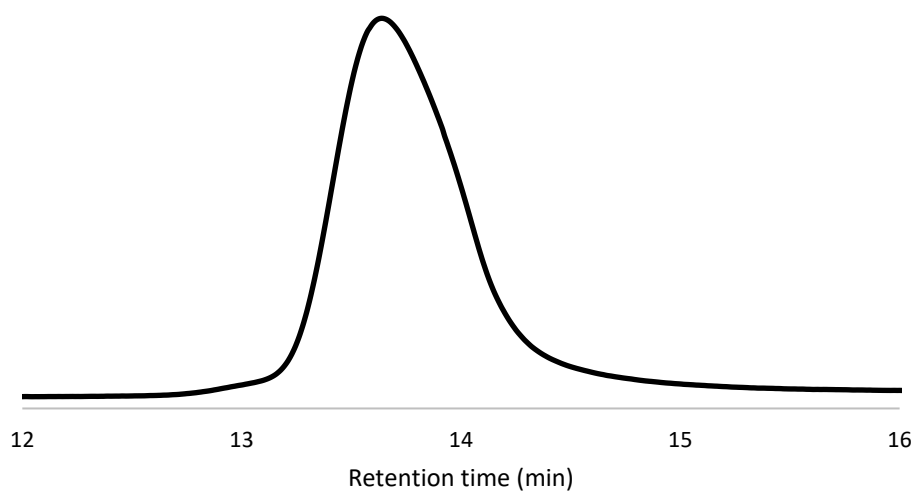

**Figure S15.** Example SEC trace of crude PCL generated in the presence of **1** in toluene at 60 °C (1 h) (table 2, entry 2)

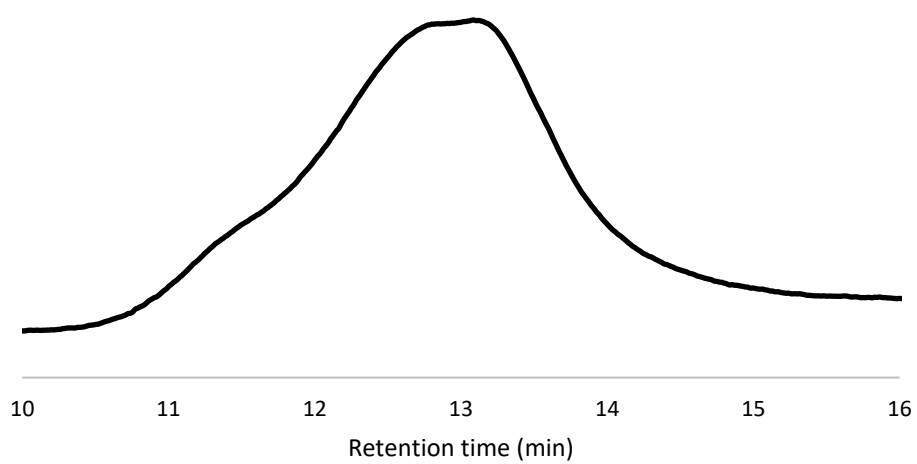

**Figure S16.** Example SEC trace of crude PCL generated in the presence of **1** in toluene at 60 °C (4 h) (table 2, entry 3)

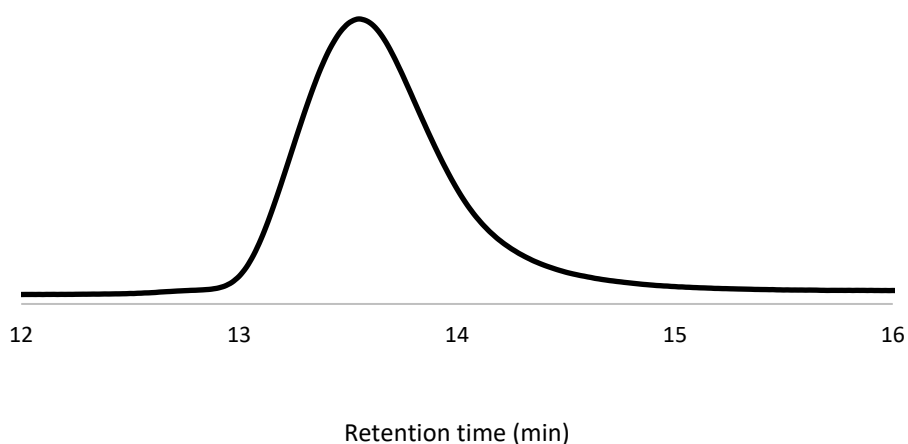

**Figure S17.** Example SEC trace of crude PCL generated in the presence of **2** in toluene at RT (2 h) (table 2, entry 7)

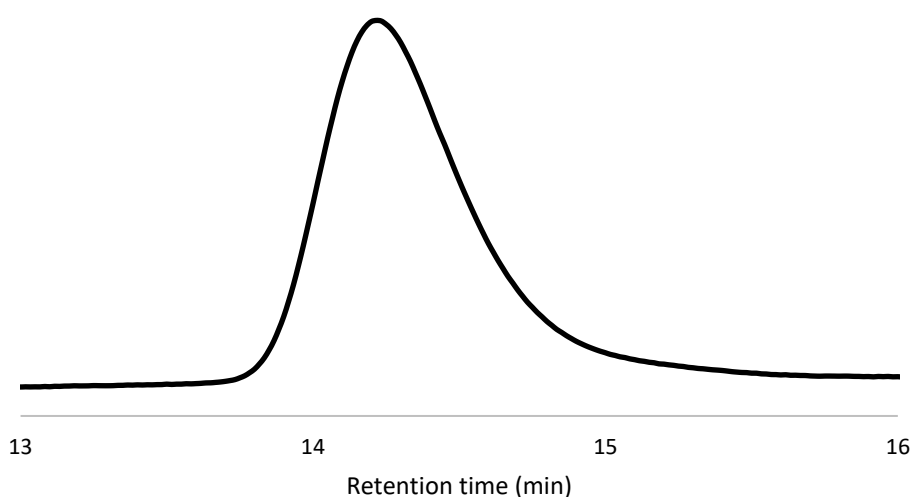

**Figure S18.** Example SEC trace of crude PCL generated in the presence of **2** in THF at RT (2 h).

## 8. Equations

**Equation S1:**  $\text{Loading} = [N \times M_{n, \text{observed}}] / [\text{Conversion} \times \text{MW}_{\epsilon\text{CL}}]$ ;  $M_{n, \text{observed}}$  is the  $M_n$  value of the PCL obtained from SEC analysis ( $\text{g mol}^{-1}$ ),  $\text{Conversion} = [\epsilon\text{CL}]_t / [\epsilon\text{CL}]_0$ ;  $\text{MW}_{\epsilon\text{CL}} = 114.14 \text{ g mol}^{-1}$ ;  $N$  = no. of ROP initiating groups (1 in each instance).

**Equation S2:**  $n_{\text{cat}} = n_{\text{CL}} / \text{Loading}$ ;  $n_{\text{CL}}$  = no. of mmol of  $\epsilon\text{CL}$  used;  $n_{\text{cat}}$  = no. of mmol of active catalyst, loading = value calculated using equation S1.

**Equation S3:**  $\% \text{ active catalyst} = n_{\text{cat}} / n_{\text{cat}[0]}$ ;  $n_{\text{cat}[0]}$  = no. of mmol of catalyst added;  $n_{\text{cat}}$  = value calculated using equation S2.<sup>5</sup>

## 9. Crystal refinement data

**Table S2.** Crystal data and structure refinement for complex **1** (co-crystallised out of CH<sub>2</sub>Cl<sub>2</sub>) and **2**

| Complex                                     | <b>1</b>                                                                                            | <b>2</b>                                                   |
|---------------------------------------------|-----------------------------------------------------------------------------------------------------|------------------------------------------------------------|
| CCDC number                                 | 2285019                                                                                             | 2285020                                                    |
| Empirical formula                           | C <sub>34</sub> H <sub>45</sub> N <sub>3</sub> OZn(CH <sub>2</sub> Cl <sub>2</sub> ) <sub>0.5</sub> | C <sub>35</sub> H <sub>47</sub> N <sub>3</sub> OZn         |
| Formula weight                              | 619.56                                                                                              | 591.12                                                     |
| Temperature/K                               | 120.01(11)                                                                                          | 120.0(5)                                                   |
| Crystal system                              | monoclinic                                                                                          | triclinic                                                  |
| Space group                                 | P21/c                                                                                               | P-1                                                        |
| a/Å                                         | 13.2654(6)                                                                                          | 12.3962(3)                                                 |
| b/Å                                         | 16.8069(3)                                                                                          | 16.5432(4)                                                 |
| c/Å                                         | 21.0819(11)                                                                                         | 17.1649(4)                                                 |
| α/°                                         | 90                                                                                                  | 78.352(2)                                                  |
| β/°                                         | 135.126(9)                                                                                          | 83.508(2)                                                  |
| γ/°                                         | 90                                                                                                  | 70.096(2)                                                  |
| Volume/Å <sup>3</sup>                       | 3316.2(4)                                                                                           | 3237.86(14)                                                |
| Z                                           | 4                                                                                                   | 4                                                          |
| ρ <sub>calc</sub> g/cm <sup>3</sup>         | 1.241                                                                                               | 1.213                                                      |
| μ/mm <sup>-1</sup>                          | 0.851                                                                                               | 0.789                                                      |
| F(000)                                      | 1316.0                                                                                              | 1264.0                                                     |
| Crystal size/mm <sup>3</sup>                | 0.439 × 0.158 × 0.09                                                                                | 0.425 × 0.216 × 0.073                                      |
| Radiation                                   | Mo Kα (λ = 0.71073)                                                                                 | Mo Kα (λ = 0.71073)                                        |
| 2θ range for data collection/°              | 6.64 to 59.07                                                                                       | 6.544 to 50.75                                             |
| Index ranges                                | -17 ≤ h ≤ 18, -22 ≤ k ≤ 23, -29 ≤ l ≤ 26                                                            | -14 ≤ h ≤ 14, -19 ≤ k ≤ 19, -20 ≤ l ≤ 20                   |
| Reflections collected                       | 72427                                                                                               | 19098                                                      |
| Independent reflections                     | 8388 [R <sub>int</sub> = 0.0419, R <sub>sigma</sub> = 0.0300]                                       | 19098 [R <sub>int</sub> = ?, R <sub>sigma</sub> = 0.1119]* |
| Data/restraints/parameters                  | 8388/8/411                                                                                          | 19098/30/744                                               |
| Goodness-of-fit on F <sup>2</sup>           | 1.032                                                                                               | 0.916                                                      |
| Final R indexes [I ≥ 2σ (I)]                | R <sub>1</sub> = 0.0326, wR <sub>2</sub> = 0.0735                                                   | R <sub>1</sub> = 0.0503, wR <sub>2</sub> = 0.0932          |
| Final R indexes [all data]                  | R <sub>1</sub> = 0.0469, wR <sub>2</sub> = 0.0795                                                   | R <sub>1</sub> = 0.0960, wR <sub>2</sub> = 0.1007          |
| Largest diff. peak/hole / e Å <sup>-3</sup> | 0.59/-0.48                                                                                          | 0.63/-0.51                                                 |

\*non-merohedral twinning in the diffraction pattern of complex **2** was handled by CrysAlisPro, details are given in the accompanying CIF file.

## 10. DOSY parameters and instrumentation

The Diffusion-Ordered Spectroscopy (DOSY) NMR experiments were performed at 298 K on a Bruker Ascend 2 channel instrument operating at a frequency of 500 MHz for proton resonance under TopSpin (version 3.2, Bruker Biospin, Karlsruhe) and equipped with a z-gradient DCH/5mm tuneable "CryoProbe"<sup>TM</sup> probe and a GRASP II gradient spectroscopy accessory providing a maximum gradient output of 53.5 G/cm (5.35G/cmA). Diffusion ordered NMR data was acquired using the Bruker pulse program *dstebpgp3s* with a spectral width of 10330 Hz (centred on 6.175 ppm) and 32768 data points. A relaxation delay of 2 s was employed along with a diffusion time (large delta) of 100 ms and a longitudinal eddy current delay (LED) of 5 ms. Bipolar gradient pulses (little delta/2) of 1.5 ms and homospoil gradient pulses of 0.6 ms were used. The gradient strengths of the 3 homospoil pulses were -13.17%, -17.13%, -15.37%. 16 experiments were collected with the bipolar gradient strength, initially at 5% (1<sup>st</sup> experiment), linearly increased to 95% (16<sup>th</sup> experiment). All gradient pulses were smooth-square shaped (SMSQ10.100) and after each application a recovery delay of 200  $\mu$ s used. The experiment was run with 16 scans per increment, employing one stimulated echo with two spoiling gradients.

DOSY plots were generated by using the DOSY processing module of TopSpin. DOSY NMR spectra were formatted in TopSpin. Parameters were optimised empirically to find the best quality of data for presentation purposes. Diffusion coefficients were calculated by fitting intensity data to the Stejskal-Tanner expression. A calibration plot was formed through DOSY analysis of a range of standards spanning the molecular weight range of 136.24 to 622.67 g mol<sup>-1</sup> [adamantane, 136.25; 2-phenylpyridine, 155.20; pyrene, 202.26; tri(*o*-tolyl)-phosphine, 304.37; tetraphenylphthaline, 432.50 and 2,2'-bis(diphenylphosphino)-1,1'-binaphthyl (BINAP), 622.67), Table S3]. Adamantane was run a total of four times and the average observed log(D) was used. Furthermore, adamantane was used as an internal standard for all other standards used. From the diffusion coefficients of the external standards, linear calibration graphs were obtained by plotting log(D) vs log(MW) (Figure S20). Following DOSY analysis of the product, the diffusion coefficient obtained for the signals corresponding to the product allowed an estimate of the MW of the species present in solution through use of the equation  $y = mx + c$ .



**Table S3.** Diffusion coefficients of standards in toluene- $d_8$  solution compared to their molecular weights.

|                                                             |                         |                        | Gradient (m):  |                  |                         | Intercept (c): |                        |                      |            |  |
|-------------------------------------------------------------|-------------------------|------------------------|----------------|------------------|-------------------------|----------------|------------------------|----------------------|------------|--|
| Calibration factors (from the plot equation $y = mx + c$ ): |                         |                        | -0.6337        |                  |                         | -7.3836        | Uncorrected Adamantane |                      |            |  |
| Calibrant                                                   | MW <sub>real</sub> (Da) | log MW <sub>real</sub> | Observed log D | Normalised log D | MW <sub>calc</sub> (Da) | Difference     | Error (%)              | log D <sub>obs</sub> | Difference |  |
| Adamantane (Average)                                        | 136.25                  | 2.13                   | -8.7678        | -8.767875        | 152.87                  | 16.63          | 12.20                  | -                    | -          |  |
| 2-Phenylpyridine                                            | 155.20                  | 2.19                   | -8.7757        | -8.7805          | 157.32                  | 2.12           | 1.37                   | -8.763               | -0.0048    |  |
| Pyrene                                                      | 202.26                  | 2.31                   | -8.8288        | -8.8235          | 190.80                  | -11.46         | 5.67                   | -8.7731              | 0.0053     |  |
| Tri( <i>o</i> -tolyl)-phosphine                             | 304.37                  | 2.48                   | -8.8811        | -8.8819          | 230.73                  | -73.64         | 24.19                  | -8.767               | -0.0008    |  |
| Tetraphenylphthaline                                        | 432.50                  | 2.64                   | -9.0988        | -9.103           | 508.91                  | 76.41          | 17.67                  | -8.7636              | -0.0042    |  |
| BINAP                                                       | 622.67                  | 2.79                   | -9.1595        | -9.1618          | 634.50                  | 11.83          | 1.90                   | -8.7719              | -0.0023    |  |
|                                                             |                         |                        |                |                  |                         |                | Average Error (%)      | 10.5                 |            |  |

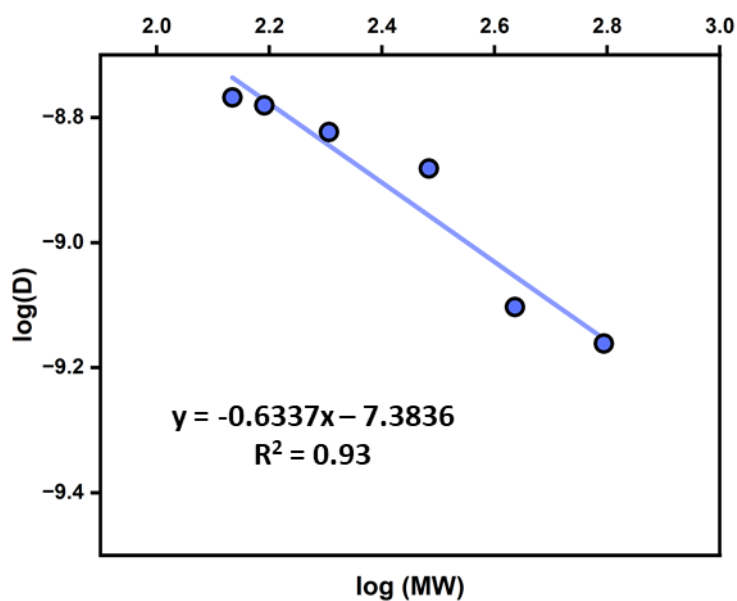

**Figure S19.** Plot of Log(D) vs. log(MW) constructed from the  $^1\text{H}$  DOSY NMR data of adamantane, 2-phenylpyridine, pyrene, tri(*o*-tolyl)-phosphine, tetraphenylphthaline and 2,2'-bis(diphenylphosphino)-1,1'-binaphthyl (BINAP) standards in toluene- $d_8$ .

## 11. Computational details for the structures of **1** and **2**

All of the calculations were performed using the Gaussian09 program<sup>6</sup> at B3PW91 level of theory<sup>7,8</sup> using LANL2DZ basis set for Zn atom and 6-311G(d,p) basis set for all other atoms. All geometry optimizations were full, with no restrictions. Stationary points located in the potential energy surface were characterized as minima (no imaginary frequencies) by vibrational analysis. Solvent effects of dichloromethane were introduced using the self-consistent field approach, by means of the integral equation formalism polarizable continuum model (IEFPCM).<sup>9</sup>

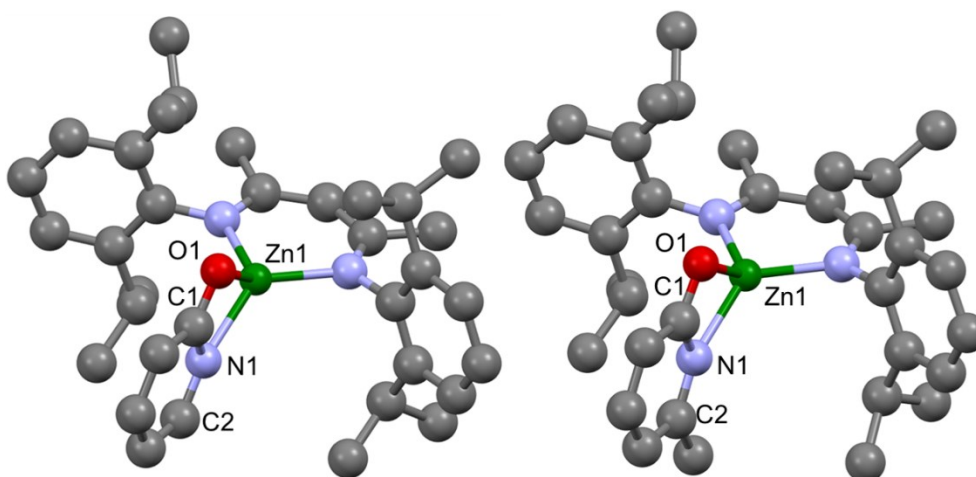

**Figure S20.** Monomeric computed structures of **1** (left) and **2** (right)

**Table S4.** Bond lengths and angles calculated for monomeric **1** and **2**

| <b>Bond</b>  | <b>Bond length / Å</b> |          |
|--------------|------------------------|----------|
|              | <b>1</b>               | <b>2</b> |
| Zn1–N1       | 2.196                  | 2.204    |
| Zn1–O1       | 2.113                  | 2.102    |
| N1–C1        | 1.362                  | 1.364    |
| O1–C1        | 1.286                  | 1.287    |
| N1–C2        | 1.341                  | 1.345    |
| <b>Bonds</b> | <b>Bond angle / °</b>  |          |
| N1–Zn1–O1    | 62.4                   | 62.5     |
| N1–C1–O1     | 115.1                  | 114.9    |
| Zn1–N1–C1    | 88.4                   | 88.0     |
| C1–O1–Zn1    | 94.1                   | 94.6     |

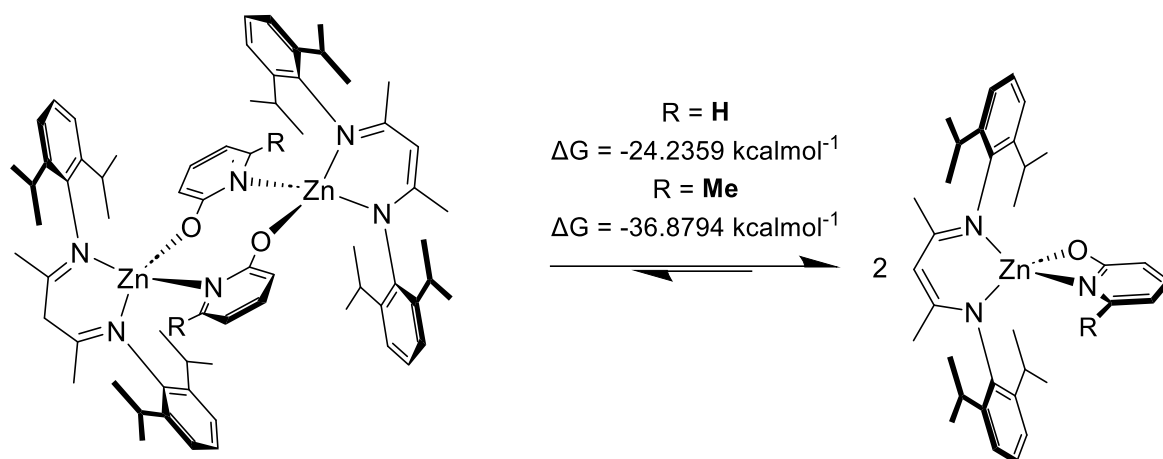

**Figure S21:** Calculated gain in free energy upon dissolution of **1** and **2** into their monomeric species

Coordinates calculated for monomers and dimers of **1** and **2**.

Monomeric **1**:

|   |          |          |          |
|---|----------|----------|----------|
| C | 7.61030  | 17.42267 | 13.68231 |
| C | 8.20341  | 16.98149 | 14.88230 |
| H | 7.88521  | 17.52789 | 15.76071 |
| C | 9.08615  | 15.91971 | 15.14796 |
| C | 6.59083  | 18.52761 | 13.83928 |
| H | 6.58751  | 19.20799 | 12.98749 |
| H | 6.77398  | 19.09458 | 14.75223 |
| H | 5.58689  | 18.09687 | 13.91128 |
| C | 9.41524  | 15.68596 | 16.60317 |
| H | 8.97836  | 14.74267 | 16.94341 |
| H | 9.02652  | 16.48924 | 17.22783 |
| H | 10.49299 | 15.60510 | 16.75794 |
| C | 7.16294  | 17.42397 | 11.33766 |
| C | 5.88743  | 16.91772 | 11.00546 |
| C | 5.24943  | 17.40785 | 9.86433  |
| H | 4.26997  | 17.02279 | 9.59823  |
| C | 5.84096  | 18.37445 | 9.06395  |
| H | 5.32492  | 18.74806 | 8.18528  |
| C | 7.10208  | 18.85295 | 9.39035  |
| H | 7.56544  | 19.60369 | 8.75845  |
| C | 7.78808  | 18.38646 | 10.51342 |
| C | 5.20747  | 15.83258 | 11.82547 |
| H | 5.79220  | 15.69121 | 12.73781 |
| C | 3.78180  | 16.21487 | 12.24175 |
| H | 3.11665  | 16.29376 | 11.37633 |
| H | 3.75509  | 17.17250 | 12.76908 |
| H | 3.36510  | 15.45146 | 12.90591 |
| C | 5.21118  | 14.49778 | 11.06658 |
| H | 4.75542  | 13.71074 | 11.67654 |
| H | 6.22895  | 14.19045 | 10.81343 |
| H | 4.63501  | 14.57608 | 10.13849 |
| C | 9.16902  | 18.93971 | 10.83029 |
| H | 9.62410  | 18.27170 | 11.56639 |
| C | 10.08495 | 18.97007 | 9.60177  |
| H | 9.75039  | 19.70498 | 8.86338  |
| H | 10.12810 | 17.99476 | 9.11125  |
| H | 11.10112 | 19.24844 | 9.89777  |
| C | 9.08605  | 20.33540 | 11.46445 |
| H | 10.08734 | 20.70818 | 11.70308 |
| H | 8.50287  | 20.32807 | 12.38816 |
| H | 8.61790  | 21.04704 | 10.77635 |
| C | 10.46244 | 14.03820 | 14.62708 |
| C | 9.89674  | 12.77565 | 14.91195 |
| C | 10.74788 | 11.71801 | 15.23784 |
| H | 10.32339 | 10.74219 | 15.45318 |
| C | 12.12409 | 11.88745 | 15.29217 |
| H | 12.76845 | 11.05298 | 15.54989 |

|    |          |          |          |
|----|----------|----------|----------|
| C  | 12.66956 | 13.13199 | 15.01191 |
| H  | 13.74675 | 13.26231 | 15.05367 |
| C  | 11.86199 | 14.22032 | 14.67519 |
| C  | 8.39758  | 12.52738 | 14.85077 |
| H  | 7.90921  | 13.49279 | 14.69601 |
| C  | 7.85132  | 11.93558 | 16.15639 |
| H  | 6.76078  | 11.85749 | 16.10842 |
| H  | 8.10681  | 12.55406 | 17.02134 |
| H  | 8.24452  | 10.93072 | 16.33840 |
| C  | 8.03783  | 11.63062 | 13.65806 |
| H  | 8.51272  | 10.64830 | 13.75116 |
| H  | 8.35744  | 12.07861 | 12.71378 |
| H  | 6.95508  | 11.47446 | 13.61118 |
| C  | 12.51538 | 15.55665 | 14.36103 |
| H  | 11.71618 | 16.26737 | 14.13516 |
| C  | 13.30590 | 16.11059 | 15.55372 |
| H  | 12.67757 | 16.22311 | 16.44120 |
| H  | 13.72149 | 17.09354 | 15.31065 |
| H  | 14.14083 | 15.45400 | 15.81797 |
| C  | 13.41598 | 15.45661 | 13.12338 |
| H  | 14.26462 | 14.78931 | 13.30386 |
| H  | 13.81769 | 16.44036 | 12.86009 |
| H  | 12.86474 | 15.06991 | 12.26325 |
| C  | 9.65537  | 14.04843 | 10.10036 |
| C  | 9.93301  | 13.33616 | 8.90676  |
| H  | 9.28300  | 12.51859 | 8.61937  |
| C  | 11.02071 | 13.70635 | 8.14772  |
| H  | 11.24435 | 13.16896 | 7.23100  |
| C  | 11.84041 | 14.77270 | 8.54974  |
| H  | 12.69890 | 15.08049 | 7.96654  |
| C  | 11.51723 | 15.42579 | 9.72204  |
| N  | 7.85886  | 16.91778 | 12.47898 |
| N  | 9.61716  | 15.11927 | 14.22729 |
| N  | 10.46453 | 15.07779 | 10.47576 |
| O  | 8.67406  | 13.80895 | 10.89559 |
| Zn | 9.18343  | 15.36058 | 12.23691 |
| H  | 12.11268 | 16.25831 | 10.08324 |

Monomeric 2:

|   |          |          |          |
|---|----------|----------|----------|
| C | 7.72967  | 17.49404 | 13.70167 |
| C | 8.34653  | 17.03965 | 14.88290 |
| H | 8.04553  | 17.57507 | 15.77451 |
| C | 9.17635  | 15.92994 | 15.13111 |
| C | 6.70137  | 18.58475 | 13.89745 |
| H | 6.68954  | 19.29135 | 13.06766 |
| H | 6.88408  | 19.12408 | 14.82702 |
| H | 5.70078  | 18.14539 | 13.95827 |
| C | 9.40329  | 15.61391 | 16.59194 |
| H | 8.64921  | 14.89728 | 16.93319 |
| H | 9.30211  | 16.51338 | 17.19995 |
| H | 10.37920 | 15.16393 | 16.77255 |
| C | 7.15337  | 17.47076 | 11.39063 |
| C | 5.91457  | 16.84867 | 11.11734 |
| C | 5.16293  | 17.29904 | 10.03052 |
| H | 4.21116  | 16.82501 | 9.81113  |
| C | 5.60478  | 18.33902 | 9.22566  |
| H | 5.00188  | 18.67931 | 8.38980  |
| C | 6.82731  | 18.93618 | 9.49577  |
| H | 7.17362  | 19.74718 | 8.86256  |
| C | 7.62203  | 18.51573 | 10.56441 |
| C | 5.38143  | 15.69096 | 11.94670 |
| H | 6.06515  | 15.54182 | 12.78589 |
| C | 3.98955  | 15.97976 | 12.52420 |
| H | 3.23712  | 16.06012 | 11.73338 |
| H | 3.96989  | 16.91125 | 13.09631 |
| H | 3.68034  | 15.16816 | 13.19010 |
| C | 5.36353  | 14.39410 | 11.12541 |
| H | 5.01275  | 13.55845 | 11.73967 |
| H | 6.36083  | 14.15019 | 10.75219 |
| H | 4.68670  | 14.48449 | 10.26936 |
| C | 8.95664  | 19.20185 | 10.80527 |
| H | 9.46680  | 18.64960 | 11.59900 |
| C | 9.84294  | 19.16322 | 9.55489  |
| H | 9.41278  | 19.75369 | 8.74019  |
| H | 9.97513  | 18.14068 | 9.19307  |
| H | 10.82950 | 19.58202 | 9.77572  |
| C | 8.78153  | 20.64957 | 11.28487 |
| H | 9.75691  | 21.10968 | 11.47249 |
| H | 8.20274  | 20.70597 | 12.20994 |
| H | 8.26704  | 21.25337 | 10.53043 |
| C | 10.45310 | 13.99181 | 14.57476 |
| C | 9.78356  | 12.78576 | 14.87594 |
| C | 10.54443 | 11.66590 | 15.21817 |
| H | 10.04062 | 10.73213 | 15.44756 |
| C | 11.92936 | 11.72107 | 15.26933 |
| H | 12.50207 | 10.84148 | 15.54557 |
| C | 12.57828 | 12.90607 | 14.95180 |

|    |          |          |          |
|----|----------|----------|----------|
| H  | 13.66219 | 12.94024 | 14.98161 |
| C  | 11.86459 | 14.05010 | 14.59001 |
| C  | 8.27111  | 12.65459 | 14.79678 |
| H  | 7.85622  | 13.65686 | 14.66380 |
| C  | 7.66160  | 12.06635 | 16.07525 |
| H  | 6.56914  | 12.08013 | 16.01301 |
| H  | 7.95663  | 12.63204 | 16.96338 |
| H  | 7.96712  | 11.02645 | 16.22669 |
| C  | 7.86749  | 11.82207 | 13.57127 |
| H  | 8.26253  | 10.80346 | 13.64651 |
| H  | 8.24438  | 12.26784 | 12.64725 |
| H  | 6.77731  | 11.75309 | 13.49775 |
| C  | 12.61053 | 15.32786 | 14.24114 |
| H  | 11.91657 | 15.95309 | 13.67046 |
| C  | 13.01089 | 16.11469 | 15.49705 |
| H  | 12.14177 | 16.39561 | 16.09550 |
| H  | 13.53854 | 17.03341 | 15.22125 |
| H  | 13.67836 | 15.52019 | 16.12951 |
| C  | 13.84231 | 15.07143 | 13.36672 |
| H  | 14.62831 | 14.54526 | 13.91660 |
| H  | 14.26775 | 16.02099 | 13.02989 |
| H  | 13.59282 | 14.47765 | 12.48357 |
| C  | 9.87656  | 14.18210 | 10.08388 |
| C  | 10.20140 | 13.44472 | 8.92255  |
| H  | 9.55415  | 12.63369 | 8.61224  |
| C  | 11.34510 | 13.78050 | 8.23083  |
| H  | 11.61878 | 13.22259 | 7.34005  |
| C  | 12.16128 | 14.83013 | 8.66783  |
| H  | 13.06462 | 15.09734 | 8.13299  |
| C  | 11.79242 | 15.53503 | 9.80583  |
| C  | 12.60327 | 16.69423 | 10.30404 |
| H  | 12.36968 | 17.59674 | 9.73163  |
| H  | 13.67215 | 16.50192 | 10.19135 |
| H  | 12.38813 | 16.89718 | 11.35344 |
| N  | 7.95361  | 17.00836 | 12.48361 |
| N  | 9.70641  | 15.14995 | 14.19459 |
| N  | 10.67788 | 15.21065 | 10.48518 |
| O  | 8.85567  | 13.96410 | 10.83687 |
| Zn | 9.32699  | 15.49045 | 12.20344 |

Dimeric 1:

|   |          |         |          |
|---|----------|---------|----------|
| C | -0.58935 | 4.59161 | 10.66666 |
| C | -1.97252 | 4.38273 | 10.83175 |
| H | -2.22908 | 3.42161 | 11.25884 |
| C | -3.06895 | 5.25782 | 10.68625 |
| C | 1.37018  | 5.86622 | 10.23883 |
| C | 1.88781  | 6.58828 | 11.34029 |
| C | 3.26826  | 6.76637 | 11.44054 |
| H | 3.67526  | 7.30985 | 12.28658 |
| C | 4.13378  | 6.26698 | 10.47669 |
| H | 5.20450  | 6.41780 | 10.57148 |
| C | 3.61608  | 5.58116 | 9.38908  |
| H | 4.29167  | 5.20046 | 8.62929  |
| C | 2.24302  | 5.36453 | 9.25052  |
| C | 0.97493  | 7.14451 | 12.42153 |
| H | -0.00962 | 7.27687 | 11.96325 |
| C | 0.80979  | 6.15946 | 13.58813 |
| H | 1.78025  | 5.93532 | 14.04360 |
| H | 0.36111  | 5.21781 | 13.26687 |
| H | 0.16557  | 6.58822 | 14.36239 |
| C | 1.43860  | 8.50352 | 12.95603 |
| H | 2.34006  | 8.41238 | 13.57010 |
| H | 0.66239  | 8.93962 | 13.59190 |
| H | 1.65345  | 9.20525 | 12.14657 |
| C | 1.74033  | 4.61185 | 8.03173  |
| H | 0.67154  | 4.43753 | 8.17189  |
| C | 1.90865  | 5.45496 | 6.76238  |
| H | 1.41072  | 6.42182 | 6.85877  |
| H | 1.48071  | 4.93759 | 5.89856  |
| H | 2.96612  | 5.64421 | 6.55434  |
| C | 2.41857  | 3.24723 | 7.85734  |
| H | 3.48252  | 3.35393 | 7.62413  |
| H | 1.95579  | 2.69893 | 7.03092  |
| H | 2.33703  | 2.63331 | 8.75839  |
| C | -4.17310 | 7.30535 | 10.16878 |
| C | -5.19255 | 7.18721 | 9.19905  |
| C | -6.29591 | 8.04087 | 9.27694  |
| H | -7.08399 | 7.95460 | 8.53527  |
| C | -6.40730 | 8.99264 | 10.27798 |
| H | -7.27654 | 9.64103 | 10.32417 |
| C | -5.39235 | 9.11442 | 11.21757 |
| H | -5.47851 | 9.86502 | 11.99582 |
| C | -4.26617 | 8.29148 | 11.17950 |
| C | -5.13490 | 6.18022 | 8.06266  |
| H | -4.24863 | 5.56008 | 8.21362  |
| C | -6.36273 | 5.25966 | 8.03281  |
| H | -7.27186 | 5.81715 | 7.78633  |
| H | -6.52990 | 4.76467 | 8.99275  |
| H | -6.23640 | 4.48539 | 7.26962  |
| C | -4.98146 | 6.88874 | 6.71102  |



|    |          |          |          |
|----|----------|----------|----------|
| H  | -5.86479 | 7.49427  | 6.48534  |
| H  | -4.86321 | 6.15611  | 5.90664  |
| H  | -4.11259 | 7.54898  | 6.69696  |
| C  | -3.18539 | 8.43455  | 12.23900 |
| H  | -2.26004 | 8.04714  | 11.80065 |
| C  | -2.93783 | 9.88708  | 12.65634 |
| H  | -2.77583 | 10.53411 | 11.79070 |
| H  | -2.05195 | 9.94598  | 13.29548 |
| H  | -3.77467 | 10.29432 | 13.23217 |
| C  | -3.50086 | 7.58013  | 13.47547 |
| H  | -3.57998 | 6.51999  | 13.22692 |
| H  | -4.44759 | 7.89387  | 13.92774 |
| H  | -2.71440 | 7.68935  | 14.22897 |
| C  | 0.29355  | 3.45134  | 11.12573 |
| H  | 0.63597  | 2.88043  | 10.25670 |
| H  | -0.24954 | 2.77257  | 11.78290 |
| H  | 1.18571  | 3.80930  | 11.64080 |
| C  | -4.38216 | 4.71517  | 11.20680 |
| H  | -5.01048 | 5.49856  | 11.63100 |
| H  | -4.21237 | 3.94635  | 11.96064 |
| H  | -4.94374 | 4.25963  | 10.38566 |
| C  | -0.20772 | 9.99554  | 8.89401  |
| C  | 0.09272  | 12.02514 | 7.75784  |
| H  | 0.18019  | 12.50923 | 6.78834  |
| C  | 0.19131  | 12.75931 | 8.91810  |
| H  | 0.36002  | 13.82800 | 8.88019  |
| C  | 0.05484  | 12.06996 | 10.13167 |
| H  | 0.11200  | 12.60393 | 11.07553 |
| C  | -0.14672 | 10.71112 | 10.12246 |
| N  | -0.04477 | 5.68332  | 10.13935 |
| N  | -3.01570 | 6.46519  | 10.13439 |
| O  | -0.31190 | 8.72279  | 8.85258  |
| Zn | -1.28719 | 7.00382  | 9.07183  |
| C  | -1.08232 | 12.21485 | 4.20968  |
| C  | 0.30070  | 12.42435 | 4.04412  |
| H  | 0.55666  | 13.38542 | 3.61654  |
| C  | 1.39769  | 11.55000 | 4.18993  |
| C  | -3.04103 | 10.93910 | 4.63835  |
| C  | -3.55831 | 10.21609 | 3.53731  |
| C  | -4.93861 | 10.03658 | 3.43763  |
| H  | -5.34539 | 9.49225  | 2.59203  |
| C  | -5.80429 | 10.53556 | 4.40158  |
| H  | -6.87488 | 10.38359 | 4.30721  |
| C  | -5.28691 | 11.22243 | 5.48865  |
| H  | -5.96262 | 11.60290 | 6.24845  |
| C  | -3.91400 | 11.44045 | 5.62667  |
| C  | -2.64521 | 9.66038  | 2.45600  |
| H  | -1.66062 | 9.52827  | 2.91426  |
| C  | -2.48027 | 10.64572 | 1.28960  |
| H  | -3.45078 | 10.86994 | 0.83428  |
| H  | -2.03151 | 11.58728 | 1.61096  |

|   |          |          |         |
|---|----------|----------|---------|
| H | -1.83614 | 10.21708 | 0.51519 |
| C | -3.10842 | 8.30137  | 1.92107 |
| H | -4.00966 | 8.39248  | 1.30668 |
| H | -2.33188 | 7.86554  | 1.28541 |
| H | -3.32345 | 7.59940  | 2.73028 |
| C | -3.41161 | 12.19416 | 6.84493 |
| H | -2.34299 | 12.36925 | 6.70441 |
| C | -3.57895 | 11.35154 | 8.11475 |
| H | -3.08033 | 10.38501 | 8.01866 |
| H | -3.15113 | 11.86960 | 8.97821 |
| H | -4.63621 | 11.16159 | 8.32318 |
| C | -4.09083 | 13.55835 | 7.01876 |
| H | -5.15467 | 13.45100 | 7.25218 |
| H | -3.62832 | 14.10739 | 7.84484 |
| H | -4.00985 | 14.17187 | 6.11738 |
| C | 2.50330  | 9.50351  | 4.70852 |
| C | 3.52265  | 9.62297  | 5.67820 |
| C | 4.62651  | 8.76991  | 5.60096 |
| H | 5.41449  | 8.85713  | 6.34262 |
| C | 4.73853  | 7.81754  | 4.60055 |
| H | 5.60818  | 7.16966  | 4.55485 |
| C | 3.72373  | 7.69453  | 3.66097 |
| H | 3.81044  | 6.94349  | 2.88320 |
| C | 2.59701  | 8.51677  | 3.69846 |
| C | 3.46432  | 10.63072 | 6.81389 |
| H | 2.57770  | 11.25025 | 6.66246 |
| C | 4.69162  | 11.55199 | 6.84323 |
| H | 5.60103  | 10.99521 | 7.09025 |
| H | 4.85864  | 12.04635 | 5.88293 |
| H | 4.56474  | 12.32675 | 7.60582 |
| C | 3.31114  | 9.92300  | 8.16598 |
| H | 4.19492  | 9.31835  | 8.39225 |
| H | 3.19209  | 10.65608 | 8.96983 |
| H | 2.44279  | 9.26211  | 8.18023 |
| C | 1.51632  | 8.37232  | 2.63905 |
| H | 0.59069  | 8.75924  | 3.07721 |
| C | 1.26985  | 6.91940  | 2.22241 |
| H | 1.10843  | 6.27265  | 3.08837 |
| H | 0.38395  | 6.85951  | 1.58338 |
| H | 2.10695  | 6.51254  | 1.64670 |
| C | 1.83109  | 9.22641  | 1.40217 |
| H | 1.90962  | 10.28669 | 1.65028 |
| H | 2.77795  | 8.91305  | 0.94990 |
| H | 1.04458  | 9.11641  | 0.64883 |
| C | -1.96594 | 13.35453 | 3.75053 |
| H | -2.30796 | 13.92576 | 4.61950 |
| H | -1.42350 | 14.03315 | 3.09265 |
| H | -2.85831 | 12.99601 | 3.23623 |
| C | 2.71050  | 12.09321 | 3.66897 |
| H | 3.33916  | 11.31004 | 3.24486 |
| H | 2.54016  | 12.86172 | 2.91494 |

|    |          |          |          |
|----|----------|----------|----------|
| H  | 3.27200  | 12.54928 | 4.48988  |
| C  | -1.46212 | 6.81127  | 5.98335  |
| C  | -1.76472 | 4.78110  | 7.11800  |
| H  | -1.85310 | 4.29649  | 8.08714  |
| C  | -1.86307 | 4.04784  | 5.95712  |
| H  | -2.03251 | 2.97924  | 5.99412  |
| C  | -1.72543 | 4.73798  | 4.74414  |
| H  | -1.78238 | 4.20470  | 3.79987  |
| C  | -1.52297 | 6.09671  | 4.75436  |
| H  | -1.42013 | 6.66026  | 3.83648  |
| N  | -1.62620 | 11.12304 | 4.73748  |
| N  | 1.34532  | 10.34285 | 4.74237  |
| N  | -1.56021 | 6.11401  | 7.15078  |
| O  | -1.35678 | 8.08386  | 6.02639  |
| Zn | -0.38293 | 9.80306  | 5.80450  |
| H  | -0.24876 | 10.14808 | 11.04075 |
| N  | -0.11091 | 10.69203 | 7.72600  |

Dimeric form of 2:

|   |          |         |          |
|---|----------|---------|----------|
| C | -0.51046 | 4.76573 | 10.85601 |
| C | -1.88979 | 4.59667 | 11.08217 |
| H | -2.14136 | 3.69231 | 11.62289 |
| C | -2.99148 | 5.42877 | 10.80949 |
| C | 1.44767  | 5.93132 | 10.18682 |
| C | 2.02016  | 6.66261 | 11.25651 |
| C | 3.40840  | 6.79681 | 11.31344 |
| H | 3.85557  | 7.34021 | 12.13918 |
| C | 4.23126  | 6.25453 | 10.33619 |
| H | 5.30859  | 6.36974 | 10.40064 |
| C | 3.66024  | 5.57364 | 9.27285  |
| H | 4.30002  | 5.15671 | 8.50106  |
| C | 2.27785  | 5.39683 | 9.17839  |
| C | 1.17250  | 7.28846 | 12.35421 |
| H | 0.15452  | 7.36831 | 11.96168 |
| C | 1.11787  | 6.41255 | 13.61471 |
| H | 2.12346  | 6.25918 | 14.02074 |
| H | 0.68147  | 5.43252 | 13.41690 |
| H | 0.51404  | 6.89722 | 14.38864 |
| C | 1.65086  | 8.69532 | 12.73225 |
| H | 2.60226  | 8.66759 | 13.27227 |
| H | 0.92167  | 9.17407 | 13.39324 |
| H | 1.77941  | 9.32753 | 11.85133 |
| C | 1.72577  | 4.61081 | 8.00366  |
| H | 0.63944  | 4.60893 | 8.09828  |
| C | 2.07377  | 5.26874 | 6.66442  |
| H | 1.75122  | 6.31182 | 6.63341  |
| H | 1.58396  | 4.73807 | 5.84278  |
| H | 3.15187  | 5.25027 | 6.47904  |
| C | 2.19879  | 3.15103 | 8.01790  |
| H | 3.28371  | 3.08622 | 7.88594  |
| H | 1.73167  | 2.59062 | 7.20185  |
| H | 1.94877  | 2.65272 | 8.95780  |
| C | -4.10147 | 7.41543 | 10.12853 |
| C | -5.06318 | 7.34032 | 9.09802  |
| C | -6.18631 | 8.16898 | 9.16047  |
| H | -6.93117 | 8.11055 | 8.37276  |
| C | -6.37610 | 9.05342 | 10.20993 |
| H | -7.26141 | 9.68032 | 10.24690 |
| C | -5.41644 | 9.13688 | 11.20952 |
| H | -5.56207 | 9.83792 | 12.02447 |
| C | -4.26960 | 8.34182 | 11.18716 |
| C | -4.94009 | 6.37491 | 7.93293  |
| H | -4.00268 | 5.83040 | 8.05918  |
| C | -6.08584 | 5.35342 | 7.91323  |
| H | -7.04763 | 5.84327 | 7.73053  |
| H | -6.16598 | 4.81037 | 8.85806  |
| H | -5.93107 | 4.62220 | 7.11342  |
| C | -4.86985 | 7.11284 | 6.59110  |

|    |          |          |          |
|----|----------|----------|----------|
| H  | -5.79680 | 7.65890  | 6.39067  |
| H  | -4.72309 | 6.39902  | 5.77452  |
| H  | -4.04458 | 7.82754  | 6.56407  |
| C  | -3.25151 | 8.47101  | 12.31114 |
| H  | -2.30366 | 8.08430  | 11.92434 |
| C  | -3.03171 | 9.92404  | 12.74718 |
| H  | -2.84610 | 10.57887 | 11.89328 |
| H  | -2.17035 | 9.98579  | 13.41930 |
| H  | -3.89342 | 10.31686 | 13.29573 |
| C  | -3.63196 | 7.62487  | 13.53520 |
| H  | -3.68001 | 6.56060  | 13.30132 |
| H  | -4.60811 | 7.93147  | 13.92593 |
| H  | -2.89410 | 7.75788  | 14.33293 |
| C  | 0.35902  | 3.66998  | 11.43814 |
| H  | 0.43414  | 2.85549  | 10.70901 |
| H  | -0.08429 | 3.25615  | 12.34467 |
| H  | 1.37131  | 4.00650  | 11.65495 |
| C  | -4.31497 | 4.90116  | 11.32534 |
| H  | -5.02112 | 5.69432  | 11.56673 |
| H  | -4.17056 | 4.27107  | 12.20346 |
| H  | -4.77435 | 4.28197  | 10.54742 |
| C  | -0.28051 | 9.89445  | 8.97049  |
| C  | 0.01856  | 12.11974 | 8.25343  |
| C  | -0.04724 | 12.59392 | 9.55149  |
| H  | 0.07978  | 13.65185 | 9.74455  |
| C  | -0.27956 | 11.68860 | 10.59148 |
| H  | -0.35240 | 12.03985 | 11.61629 |
| C  | -0.40063 | 10.35235 | 10.30775 |
| N  | 0.02777  | 5.75229  | 10.14439 |
| N  | -2.94491 | 6.57046  | 10.12469 |
| O  | -0.27209 | 8.65063  | 8.67578  |
| Zn | -1.25292 | 6.90196  | 8.89821  |
| C  | -1.15917 | 12.04086 | 4.01953  |
| C  | 0.22025  | 12.20989 | 3.79410  |
| H  | 0.47210  | 13.11396 | 3.25302  |
| C  | 1.32189  | 11.37800 | 4.06785  |
| C  | -3.11763 | 10.87503 | 4.68734  |
| C  | -3.68891 | 10.14382 | 3.61689  |
| C  | -5.07705 | 10.00910 | 3.55876  |
| H  | -5.52329 | 9.46573  | 2.73250  |
| C  | -5.90101 | 10.55085 | 4.53538  |
| H  | -6.97823 | 10.43520 | 4.46994  |
| C  | -5.33121 | 11.23176 | 5.59933  |
| H  | -5.97183 | 11.64829 | 6.37065  |
| C  | -3.94897 | 11.40904 | 5.69507  |
| C  | -2.84010 | 9.51851  | 2.51971  |
| H  | -1.82255 | 9.43833  | 2.91330  |
| C  | -2.78394 | 10.39505 | 1.25969  |
| H  | -3.78907 | 10.54880 | 0.85267  |
| H  | -2.34753 | 11.37487 | 1.45837  |
| H  | -2.17940 | 9.91057  | 0.48619  |

|   |          |          |         |
|---|----------|----------|---------|
| C | -3.31821 | 8.11194  | 2.14026 |
| H | -4.26865 | 8.14021  | 1.59859 |
| H | -2.58803 | 7.63330  | 1.48029 |
| H | -3.44848 | 7.47940  | 3.02068 |
| C | -3.39833 | 12.19514 | 6.87042 |
| H | -2.31195 | 12.19771 | 6.77666 |
| C | -3.74691 | 11.53677 | 8.20929 |
| H | -3.42335 | 10.49402 | 8.24048 |
| H | -3.25828 | 12.06782 | 9.03140 |
| H | -4.82517 | 11.55422 | 8.39379 |
| C | -3.87220 | 13.65464 | 6.85605 |
| H | -4.95727 | 13.71878 | 6.98714 |
| H | -3.40606 | 14.21517 | 7.67258 |
| H | -3.62171 | 14.15327 | 5.91644 |
| C | 2.43180  | 9.39217  | 4.75133 |
| C | 3.39285  | 9.46849  | 5.78236 |
| C | 4.51616  | 8.63995  | 5.72137 |
| H | 5.26052  | 8.69921  | 6.50947 |
| C | 4.70681  | 7.75467  | 4.67277 |
| H | 5.59230  | 7.12798  | 4.63688 |
| C | 3.74776  | 7.67005  | 3.67269 |
| H | 3.89406  | 6.96830  | 2.85847 |
| C | 2.60064  | 8.46474  | 3.69375 |
| C | 3.26890  | 10.43513 | 6.94635 |
| H | 2.33142  | 10.97931 | 6.81904 |
| C | 4.41439  | 11.45692 | 6.96548 |
| H | 5.37621  | 10.96748 | 7.14909 |
| H | 4.49478  | 11.99899 | 6.02011 |
| H | 4.25908  | 12.18894 | 7.76445 |
| C | 3.19813  | 9.69866  | 8.28898 |
| H | 4.12510  | 9.15305  | 8.49051 |
| H | 3.05079  | 10.41339 | 9.10466 |
| H | 2.37299  | 8.98384  | 8.31636 |
| C | 1.58294  | 8.33393  | 2.56959 |
| H | 0.63503  | 8.72133  | 2.95550 |
| C | 1.36304  | 6.88019  | 2.13596 |
| H | 1.17667  | 6.22698  | 2.99093 |
| H | 0.50208  | 6.81743  | 1.46342 |
| H | 2.22500  | 6.48617  | 1.58868 |
| C | 1.96385  | 9.17814  | 1.34435 |
| H | 2.01207  | 10.24275 | 1.57669 |
| H | 2.94003  | 8.87079  | 0.95427 |
| H | 1.22614  | 9.04410  | 0.54666 |
| C | -2.02853 | 13.13643 | 3.43691 |
| H | -2.10591 | 13.95001 | 4.16682 |
| H | -1.58394 | 13.55169 | 2.53166 |
| H | -3.04010 | 12.79917 | 3.21784 |
| C | 2.64554  | 11.90514 | 3.55195 |
| H | 3.35169  | 11.11173 | 3.31139 |
| H | 2.50139  | 12.53452 | 2.67328 |
| H | 3.10473  | 12.52492 | 4.32950 |

|    |          |          |          |
|----|----------|----------|----------|
| C  | -1.39153 | 6.91377  | 5.90790  |
| C  | -1.69389 | 4.68851  | 6.62352  |
| C  | -1.62967 | 4.21525  | 5.32501  |
| H  | -1.75835 | 3.15764  | 5.13123  |
| C  | -1.39657 | 5.12098  | 4.28558  |
| H  | -1.32486 | 4.77038  | 3.26046  |
| C  | -1.27310 | 6.45684  | 4.57022  |
| H  | -1.11230 | 7.19470  | 3.79676  |
| N  | -1.69781 | 11.05449 | 4.73117  |
| N  | 1.27514  | 10.23694 | 4.75363  |
| N  | -1.54220 | 6.00542  | 6.92039  |
| O  | -1.39689 | 8.15724  | 6.20415  |
| Zn | -0.41766 | 9.90625  | 5.97940  |
| H  | -0.56052 | 9.61479  | 11.08170 |
| N  | -0.13106 | 10.80235 | 7.95739  |
| C  | -1.98263 | 3.73448  | 7.74145  |
| H  | -1.33291 | 3.89986  | 8.60127  |
| H  | -3.01036 | 3.86000  | 8.09620  |
| H  | -1.86620 | 2.70257  | 7.40788  |
| C  | 0.30700  | 13.07320 | 7.13497  |
| H  | 1.33560  | 12.94948 | 6.78208  |
| H  | -0.34097 | 12.90545 | 6.27429  |
| H  | 0.18780  | 14.10524 | 7.46717  |

## 12. References

1. M. P. Blake, N. Kaltsoyannis and P. Mountford, *Chem. Commun.*, 2015, **51** (26), 5743–5746.
2. A. P. Dove, V. C. Gibson, E. L. Marshall, A. J. P. White and D. J. Williams, *Dalton Trans.*, 2004, **4**, 570–578.
3. P. Ni, L. Yang, Y. Shen, L. Zhang, Y. Ma, M. Sun, R. Cheng, and J. Ye, *J. Org. Chem.*, 2022, **87** (19), 12677–12687.
4. A. Kowalski, A. Duda and S. Penczek, *Macromolecules*, 1998, **31** (7), 2114–2122.
5. A. Thevenon, C. Romain, M. S. Bennington, A. J. White, H. J. Davidson, S. Brooker and C. K. Williams, *Angew. Chem., Int. Ed.*, 2016, **55**, 8680–8685.
6. Gaussian 09, Revision E.01, M. J. Frisch, G. W. Trucks, H. B. Schlegel, G. E. Scuseria, M. A. Robb, J. R. Cheeseman, G. Scalmani, V. Barone, B. Mennucci, G. A. Petersson, H. Nakatsuji, M. Caricato, X. Li, H. P. Hratchian, A. F. Izmaylov, J. Bloino, G. Zheng, J. L. Sonnenberg, M. Hada, M. Ehara, K. Toyota, R. Fukuda, J. Hasegawa, M. Ishida, T. Nakajima, Y. Honda, O. Kitao, H. Nakai, T. Vreven, J. A. Montgomery, Jr., J. E. Peralta, F. Ogliaro, M. Bearpark, J. J. Heyd, E. Brothers, K. N. Kudin, V. N. Staroverov, T. Keith, R. Kobayashi, J. Normand, K. Raghavachari, A. Rendell, J. C. Burant, S. S. Iyengar, J. Tomasi, M. Cossi, N. Rega, J. M. Millam, M. Klene, J. E. Knox, J. B. Cross, V. Bakken, C. Adamo, J. Jaramillo, R. Gomperts, R. E. Stratmann, O. Yazyev, A. J. Austin, R. Cammi, C. Pomelli, J. W. Ochterski, R. L. Martin, K. Morokuma, V. G. Zakrzewski, G. A. Voth, P. Salvador, J. J. Dannenberg, S. Dapprich, A. D. Daniels, O. Farkas, J. B. Foresman, J. V. Ortiz, J. Cioslowski, and D. J. Fox, Gaussian, Inc., Wallingford CT, 2013.
7. Becke, A. D., *J. Chem. Phys.*, 1993, **98** (7), 5648–5652.
8. Electronic Density Functional Theory: Recent Progress and New Directions; Dobson, J. F., Vignale, G., Das, M. P., Eds.; Springer US: Boston, MA, 1998.
9. B. Mennucci, E. Cancès and J. Tomasi, *J. Phys. Chem. B*, 1997, **101** (49), 10506–10517.
